# Supplementary material for: Electron transport (0.2 eV–10 keV) in liquid water: resolving discrepancies between track simulations and radiolysis data
Source: RSC Adv. 2026 Apr 17;16(22):20065–86. doi: 10.1039/d6ra00710d (PMC13088954; doi:10.1039/d6ra00710d)
Supplement: RA-016-D6RA00710D-s001 [file RA-016-D6RA00710D-s001.xlsx]

## Sheet: Cover
Supplementary Information
Title	Electron Transport (0.2 eV–10 keV) in Liquid Water: Resolving Discrepancies Between Track Simulations and Radiolysis Data
Authors	Hoon Lee a,b, David M. Bartels a,c, Ryan G. McClarren b,*
	a Notre Dame Radiation Laboratory, University of Notre Dame, Notre Dame, Indiana 46556, United States
	b Department of Aerospace and Mechanical Engineering, University of Notre Dame, Notre Dame, Indiana 46556, United States
	c Department of Chemistry and Biochemistry, University of Notre Dame, Notre Dame, Indiana 46556, United States
Data supporting the findings of this study
	Tab	Data	Reference	Figure
	1	Electron scattering cross sections	[21] Michaud et al. (2003) [68] Gadeyne et al. (2022) [14] Song et al. (2021)	1
	2	Elastic Angular Differential Cross Section (ADCS)	[68] Gadeyne et al. (2022)	-
	3	Optical energy loss function (OELF)	[29] Hayashi et al. (2000)	2
	4	Random phase approximation (RPA) energy loss function (ELF)	[69] Nguyen-Truong et al. (2025)	-
	5	Density of state (DOS)	[68] Gadeyne et al. (2022)	5 (a)
	6	Ionization efficiency	[98] Kyriakou et al. (2015)	5 (b)
	7	Peak energies of the vibrational excitation modes, EELS spectra	[21] Michaud et al. (2003)	S1
	8	Secondary electron energy distributions	[38] Goulet and Jay-Gerin (1988) [18: SI] Pimblott and LaVerne (2007) [68] Gadeyne et al. (2022) [66] OpenTOPAS Present work	S7
	9	Photoionization efficiency	[113] Tan et al. (1978)	-

## Sheet: 1
E (eV)	Elastic (nm2)	Inelastic: Vibrational (nm2)	Inelastic: Electronic (nm2)	DEA (nm2)	EAD (nm2)	Total (nm2)
0.1	1.89	0.00261				1.89595
0.2	1.09	0.00346				1.09316
0.3	0.789	0.00409				0.792884
0.4	0.627	0.00462				0.63179
0.5	0.525	0.00508				0.530068
0.6	0.454	0.0055				0.459484
0.7	0.401	0.00589				0.407386
0.8	0.361	0.00625				0.367215
0.9	0.329	0.0066				0.335218
1	0.302	0.00693				0.309081
1.1	0.28	0.00725				0.287297
1.2	0.261	0.00755				0.268844
1.3	0.245	0.00786				0.252996
1.4	0.231	0.00815				0.239231
1.5	0.219	0.00844				0.227155
1.6	0.208	0.00872				0.216473
1.7	0.198	0.009				0.206952
1.8	0.189	0.00867				0.197805
1.9	0.181	0.00837				0.189527
2	0.174	0.00809				0.181995
2.1	0.167	0.00784				0.17511
2.2	0.161	0.00761				0.16879
2.3	0.156	0.00739				0.162966
2.4	0.15	0.0072				0.157579
2.5	0.146	0.00701				0.15258
2.6	0.141	0.00684				0.147928
2.7	0.137	0.00668				0.143587
2.8	0.133	0.00653				0.139525
2.9	0.129	0.00639				0.135716
3	0.126	0.00625				0.132135
3.1	0.123	0.00613				0.128765
3.2	0.12	0.00607				0.12564
3.3	0.117	0.0061				0.122776
3.4	0.114	0.00613				0.120064
3.5	0.111	0.00616				0.117493
3.6	0.109	0.0062				0.115052
3.7	0.107	0.00622				0.11273
3.8	0.104	0.00625				0.11052
3.9	0.102	0.00628				0.108412
4	0.1	0.00631				0.1064
4.1	0.0981	0.00634				0.104478
4.2	0.0963	0.00637				0.102638
4.3	0.0945	0.00639				0.100877
4.4	0.0928	0.00642				0.0991878
4.5	0.0911	0.00645		2e-20	1.13333e-20	0.0975674
4.6	0.0895	0.00647		9.27678e-07	5.25684e-06	0.096017
4.7	0.088	0.0065		1.2429e-06	7.04313e-06	0.0945229
4.8	0.0866	0.00652		1.19501e-06	6.7717e-06	0.0930831
4.9	0.0851	0.00655		1.01331e-06	5.74209e-06	0.0916959
5	0.0838	0.00657		9.27143e-07	5.25381e-06	0.0903599
5.1	0.0825	0.0066		1.16583e-06	6.60639e-06	0.0890737
5.2	0.0812	0.00662		1.95871e-06	1.10993e-05	0.0878364
5.3	0.08	0.00676		3.5351e-06	2.00322e-05	0.0867587
5.4	0.0788	0.00689		6.12432e-06	3.47045e-05	0.0857294
5.5	0.0777	0.00703		9.95571e-06	5.64157e-05	0.084748
5.6	0.0765	0.00717		1.51616e-05	8.5916e-05	0.0838134
5.7	0.0755	0.00731		2.14866e-05	0.000121757	0.0829221
5.8	0.0744	0.00744		2.85782e-05	0.000161943	0.08207
5.9	0.0734	0.00759		3.6084e-05	0.000204476	0.0812533
6	0.0725	0.00773	1e-19	4.36514e-05	0.000247358	0.0804682
6.1	0.0715	0.00787	4.12528e-06	5.0903e-05	0.00028845	0.0797149
6.2	0.0706	0.00801	7.22095e-06	5.73601e-05	0.000325041	0.0789837
6.3	0.0697	0.00816	9.44452e-06	6.25192e-05	0.000354276	0.0782702
6.4	0.0688	0.0083	1.09535e-05	6.58766e-05	0.000373301	0.0775701
6.5	0.068	0.00845	1.19053e-05	6.69286e-05	0.000379262	0.0768792
6.6	0.0672	0.0086	1.24576e-05	6.53591e-05	0.000370368	0.0761944
6.7	0.0664	0.00874	1.27677e-05	6.1603e-05	0.000349084	0.0755179
6.8	0.0656	0.00889	1.29932e-05	5.62826e-05	0.000318935	0.074853
6.9	0.0648	0.00904	1.32916e-05	5.00203e-05	0.000283449	0.0742033
7	0.0641	0.00919	1.38203e-05	4.34386e-05	0.000246152	0.0735722
7.1	0.0634	0.00935	1.47369e-05	3.70835e-05	0.00021014	0.0729628
7.2	0.0627	0.0095	1.61989e-05	3.11963e-05	0.000176779	0.0723761
7.3	0.062	0.00937	1.83637e-05	2.59422e-05	0.000147006	0.0715318
7.4	0.0613	0.00925	2.13889e-05	2.1486e-05	0.000121754	0.0707147
7.5	0.0606	0.00913	2.54321e-05	1.79929e-05	0.00010196	0.0699252
7.6	0.06	0.00902	3.074e-05	1.55756e-05	8.82618e-05	0.0691635
7.7	0.0594	0.00891	3.7795e-05	1.41385e-05	8.01181e-05	0.0684287
7.8	0.0588	0.0088	4.71165e-05	1.35336e-05	7.66902e-05	0.0677197
7.9	0.0582	0.0087	5.91222e-05	1.36129e-05	7.71398e-05	0.0670352
8	0.0576	0.0086	7.40795e-05	1.42286e-05	8.06286e-05	0.0663738
8.1	0.057	0.0085	9.42733e-05	1.52288e-05	8.62965e-05	0.0657363
8.2	0.0565	0.00841	0.000126996	1.64465e-05	9.31966e-05	0.0651282
8.3	0.0559	0.00832	0.000177558	1.77106e-05	0.00010036	0.0645532
8.4	0.0554	0.00823	0.000237839	1.88502e-05	0.000106818	0.0640014
8.5	0.0549	0.00814	0.000298895	1.96943e-05	0.000111601	0.0634623
8.6	0.0544	0.00806	0.000363988	2.01071e-05	0.00011394	0.0629378
8.7	0.0539	0.00798	0.000439214	2.00937e-05	0.000113864	0.0624336
8.8	0.0534	0.0079	0.000528844	1.96941e-05	0.0001116	0.0619537
8.9	0.0529	0.00783	0.000626638	1.89485e-05	0.000107375	0.0614918
9	0.0524	0.00775	0.000722603	1.78971e-05	0.000101417	0.0610379
9.1	0.052	0.00768	0.000806759	1.65883e-05	9.40002e-05	0.060585
9.2	0.0515	0.00767	0.00087255	1.51029e-05	8.55833e-05	0.0601767
9.3	0.0511	0.00748	0.000921061	1.35303e-05	7.66719e-05	0.0595785
9.4	0.0507	0.00729	0.000954405	1.19596e-05	6.77712e-05	0.0589815
9.5	0.0502	0.00711	0.000974698	1.048e-05	5.93867e-05	0.0583876
9.6	0.0498	0.00694	0.000984053	9.1648e-06	5.19339e-05	0.0577988
9.7	0.0494	0.00677	0.000984407	8.0239e-06	4.54687e-05	0.0572165
9.8	0.049	0.00661	0.000977083	7.05131e-06	3.99574e-05	0.0566414
9.9	0.0486	0.00646	0.000963272	6.24105e-06	3.53659e-05	0.0560741
10	0.0482	0.00631	0.000944167	5.58714e-06	3.16605e-05	0.0555153
11	0.0447	0.00509	0.00070709	4.93286e-06	2.79529e-05	0.0505229
12	0.0417	0.00526	0.000879287	5.33143e-06	3.02114e-05	0.0478689
13	0.0391	0.00581	0.00139039	3.41429e-06	1.93476e-05	0.0463415
14	0.0369	0.00615	0.0019904	1.08571e-06	6.15238e-06	0.0450294
15	0.0349	0.00645	0.00235492	5.14286e-07	2.91429e-06	0.0437134
16	0.0332	0.00635	0.00285	3e-07	1.7e-06	0.0423566
17	0.0316	0.00617	0.00330522	1.07265e-07	6.07836e-07	0.0410695
18	0.0302	0.0058	0.0034544	1.42857e-07	8.09524e-07	0.0394413
19	0.0289	0.00543	0.00345743	1.42857e-07	8.09524e-07	0.0377977
20	0.0278	0.0051	0.00356854	0	0	0.0364214
21	0.0267	0.00505	0.0038752	0	0	0.0356229
22	0.0257	0.00502	0.00414745	0	0	0.0348933
23	0.0248	0.00497	0.00415928	0	0	0.0339533
24	0.024	0.00491	0.00415994	0	0	0.0330645
25	0.0232	0.00485	0.00436694	0	0	0.0324481
26	0.0225	0.00482	0.00464	0	0	0.0319747
27	0.0218	0.00479	0.00485327	0	0	0.031494
28	0.0212	0.00477	0.00500194	0	0	0.0309936
29	0.0206	0.00474	0.0051119	0	0	0.0304937
30	0.0201	0.00472	0.00521919	0	0	0.0300284
31	0.0196	0.00479	0.00537	0	0	0.0297335
32	0.0191	0.00486	0.00559219	0	0	0.0295385
33	0.0186	0.0049	0.00583847	0	0	0.029362
34	0.0182	0.00491	0.00604501	0	0	0.0291387
35	0.0178	0.00492	0.00619927	0	0	0.0288859
36	0.0174	0.00492	0.00634	0	0	0.0286315
37	0.017	0.00492	0.00649529	0	0	0.0284118
38	0.0166	0.00489	0.0066416	0	0	0.0281696
39	0.0163	0.00483	0.00674407	0	0	0.0278704
40	0.016	0.00477	0.00680423	0	0	0.0275472
41	0.0157	0.00472	0.00686	0	0	0.0272464
42	0.0154	0.00468	0.00694131	0	0	0.0269862
43	0.0151	0.00463	0.00703985	0	0	0.0267447
44	0.0148	0.00456	0.00713807	0	0	0.0265045
45	0.0145	0.0045	0.00722575	0	0	0.0262676
46	0.0143	0.00443	0.0073	0	0	0.0260189
47	0.014	0.00436	0.00735248	0	0	0.0257614
48	0.0138	0.00427	0.00735184	0	0	0.0254315
49	0.0136	0.00415	0.00726448	0	0	0.0249975
50	0.0134	0.00403	0.00713777	0	0	0.0245383
51	0.0132	0.00407	0.0071	0	0	0.0243354
52	0.013	0.00412	0.00723886	0	0	0.0243161
53	0.0128	0.00413	0.00746542	0	0	0.0243631
54	0.0126	0.00412	0.00764988	0	0	0.0243467
55	0.0124	0.00411	0.00773779	0	0	0.0242403
56	0.0122	0.00407	0.00775	0	0	0.0240349
57	0.012	0.00403	0.00771463	0	0	0.0237888
58	0.0119	0.00402	0.00767574	0	0	0.0235727
59	0.0117	0.00403	0.00767997	0	0	0.0234322
60	0.0116	0.00405	0.00774107	0	0	0.0233533
61	0.0114	0.0041	0.00784	0	0	0.0233489
62	0.0113	0.00415	0.00795764	0	0	0.0233676
63	0.0111	0.00417	0.00808045	0	0	0.0233757
64	0.011	0.00418	0.0081955	0	0	0.02336
65	0.0108	0.00419	0.00827174	0	0	0.0233094
66	0.0107	0.00414	0.00826	0	0	0.0231171
67	0.0106	0.00409	0.00815015	0	0	0.022832
68	0.0105	0.00414	0.00809128	0	0	0.0226999
69	0.0103	0.0043	0.00826462	0	0	0.0229032
70	0.0102	0.00445	0.00867483	0	0	0.0233503
71	0.0101	0.00456	0.00915	0	0	0.0238205
72	0.01	0.00467	0.00954167	0	0	0.0242128
73	0.00989	0.00473	0.00982592	0	0	0.0244441
74	0.00978	0.00473	0.0100106	0	0	0.0245216
75	0.00968	0.00473	0.010119	0	0	0.0245275
76	0.00958	0.00473	0.01019	0	0	0.0244957
77	0.00948	0.00473	0.010266	0	0	0.0244728
78	0.00938	0.00477	0.0104017	0	0	0.0245515
79	0.00929	0.00485	0.0106512	0	0	0.0247859
80	0.00919	0.00493	0.0109851	0	0	0.0251083
81	0.0091	0.00491	0.01129	0	0	0.0252997
82	0.00901	0.00488	0.0114726	0	0	0.0253714
83	0.00893	0.00486	0.0115332	0	0	0.0253233
84	0.00884	0.00484	0.0114955	0	0	0.0251792
85	0.00876	0.00482	0.0113832	0	0	0.0249627
86	0.00868	0.00473	0.01122	0	0	0.0246247
87	0.0086	0.00464	0.0110291	0	0	0.0242635
88	0.00852	0.00455	0.0108313	0	0	0.0238998
89	0.00844	0.00446	0.010647	0	0	0.0235539
90	0.00837	0.00438	0.0104965	0	0	0.0232459
91	0.0083	0.00437	0.0104	0	0	0.0230654
92	0.00822	0.00436	0.0103691	0	0	0.022952
93	0.00815	0.00435	0.0103804	0	0	0.0228824
94	0.00808	0.00434	0.0104014	0	0	0.022824
95	0.00802	0.00433	0.0104	0	0	0.0227446
96	0.00795	0.00432	0.0103639	0	0	0.0226319
97	0.00788	0.00431	0.0103612	0	0	0.0225541
98	0.00782	0.0043	0.0104773	0	0	0.0225964
99	0.00776	0.00429	0.0107306	0	0	0.0227772
100	0.0077	0.00428	0.0110724	0	0	0.0230478
110	0.00713	0.0038	0.0130751	0	0	0.0240088
120	0.00665	0.00341	0.0131602	0	0	0.0232261
130	0.00624	0.00309	0.0138252	0	0	0.0231566
140	0.00589	0.00282	0.0145309	0	0	0.0232324
150	0.00557	0.00258	0.0149096	0	0	0.0230648
160	0.00529	0.00239	0.0150833	0	0	0.02276
170	0.00504	0.00221	0.0151959	0	0	0.02245
180	0.00482	0.00206	0.0152921	0	0	0.0221701
190	0.00461	0.00193	0.0153582	0	0	0.0218992
200	0.00443	0.00181	0.01538	0	0	0.0216173
210	0.00426	0.0017	0.0153532	0	0	0.0213153
220	0.00411	0.00161	0.0152873	0	0	0.0209988
230	0.00396	0.00152	0.0151927	0	0	0.0206752
240	0.00383	0.00144	0.01508	0	0	0.0203522
250	0.00371	0.00137	0.0149568	0	0	0.0200352
260	0.00359	0.00131	0.0148251	0	0	0.0197242
270	0.00349	0.00125	0.0146859	0	0	0.0194189
280	0.00339	0.00119	0.0145406	0	0	0.0191191
290	0.00329	0.00114	0.0143905	0	0	0.0188248
300	0.00321	0.00109	0.0142365	0	0	0.0185361
310	0.00312	0.00105	0.0140798	0	0	0.0182532
320	0.00305	0.00101	0.0139212	0	0	0.017976
330	0.00297	0.000972	0.0137615	0	0	0.0177048
340	0.0029	0.000936	0.0136017	0	0	0.0174398
350	0.00284	0.000903	0.0134426	0	0	0.0171814
360	0.00277	0.000872	0.013285	0	0	0.0169299
370	0.00271	0.000843	0.0131292	0	0	0.0166851
380	0.00266	0.000816	0.0129753	0	0	0.0164467
390	0.0026	0.00079	0.0128234	0	0	0.0162146
400	0.00255	0.000766	0.0126736	0	0	0.0159884
410	0.0025	0.000743	0.012526	0	0	0.0157681
420	0.00245	0.000721	0.0123807	0	0	0.0155535
430	0.00241	0.0007	0.0122379	0	0	0.0153444
440	0.00236	0.000681	0.0120975	0	0	0.0151407
450	0.00232	0.000662	0.0119596	0	0	0.0149421
460	0.00228	0.000644	0.0118241	0	0	0.0147486
470	0.00224	0.000627	0.011691	0	0	0.0145598
480	0.0022	0.000611	0.0115604	0	0	0.0143758
490	0.00217	0.000596	0.0114322	0	0	0.0141962
500	0.00213	0.000581	0.0113064	0	0	0.0140211
510	0.0021	0.000567	0.011183	0	0	0.0138502
520	0.00207	0.000553	0.011062	0	0	0.0136835
530	0.00204	0.000541	0.0109434	0	0	0.0135209
540	0.00201	0.000528	0.0108271	0	0	0.0133622
550	0.00198	0.000516	0.0107133	0	0	0.0132073
560	0.00195	0.000505	0.0106017	0	0	0.0130562
570	0.00192	0.000494	0.0104923	0	0	0.0129085
580	0.0019	0.000484	0.0103851	0	0	0.0127643
590	0.00187	0.000473	0.0102799	0	0	0.0126234
600	0.00185	0.000464	0.0101767	0	0	0.0124856
610	0.00182	0.000454	0.0100754	0	0	0.0123508
620	0.0018	0.000445	0.00997594	0	0	0.0122188
630	0.00177	0.000437	0.00987822	0	0	0.0120896
640	0.00175	0.000428	0.00978217	0	0	0.011963
650	0.00173	0.00042	0.00968771	0	0	0.0118389
660	0.00171	0.000412	0.00959477	0	0	0.0117171
670	0.00169	0.000405	0.00950327	0	0	0.0115977
680	0.00167	0.000397	0.00941313	0	0	0.0114803
690	0.00165	0.00039	0.00932427	0	0	0.0113651
700	0.00163	0.000383	0.00923662	0	0	0.0112517
710	0.00161	0.000377	0.00915011	0	0	0.0111402
720	0.0016	0.00037	0.00906465	0	0	0.0110304
730	0.00158	0.000364	0.00898016	0	0	0.0109222
740	0.00156	0.000358	0.0088966	0	0	0.0108156
750	0.00154	0.000352	0.008814	0	0	0.0107105
760	0.00153	0.000346	0.00873239	0	0	0.0106069
770	0.00151	0.000341	0.00865183	0	0	0.010505
780	0.0015	0.000335	0.00857235	0	0	0.0104046
790	0.00148	0.00033	0.008494	0	0	0.0103059
800	0.00147	0.000325	0.00841681	0	0	0.0102089
810	0.00145	0.00032	0.00834084	0	0	0.0101135
820	0.00144	0.000315	0.00826612	0	0	0.0100198
830	0.00142	0.00031	0.0081927	0	0	0.00992789
840	0.00141	0.000306	0.00812062	0	0	0.00983772
850	0.0014	0.000301	0.00804992	0	0	0.00974933
860	0.00138	0.000297	0.00798064	0	0	0.00966276
870	0.00137	0.000293	0.00791283	0	0	0.00957804
880	0.00136	0.000289	0.00784654	0	0	0.00949519
890	0.00135	0.000285	0.00778179	0	0	0.00941426
900	0.00134	0.000281	0.00771864	0	0	0.00933526
910	0.00132	0.000277	0.00765713	0	0	0.00925823
920	0.00131	0.000273	0.00759731	0	0	0.0091832
930	0.0013	0.00027	0.0075392	0	0	0.00911021
940	0.00129	0.000266	0.00748286	0	0	0.00903929
950	0.00128	0.000263	0.00742833	0	0	0.00897046
960	0.00127	0.000259	0.00737565	0	0	0.00890378
970	0.00126	0.000256	0.00732487	0	0	0.00883926
980	0.00125	0.000253	0.00727602	0	0	0.00877694
990	0.00124	0.00025	0.00722915	0	0	0.00871687
1000	0.00123	0.000247	0.0071842	0	0	0.00865896
1100	0.00114	0.000219	0.00679977	0	0	0.00815733
1200	0.00106	0.000197	0.00643602	0	0	0.00769498
1300	0.000996	0.000178	0.00607469	0	0	0.0072495
1400	0.000939	0.000163	0.00573161	0	0	0.00683369
1500	0.000889	0.00015	0.00542182	0	0	0.00646037
1600	0.000844	0.000138	0.00514888	0	0	0.00613141
1700	0.000805	0.000128	0.00490779	0	0	0.00584055
1800	0.000769	0.000119	0.00469334	0	0	0.00558155
1900	0.000736	0.000112	0.00450034	0	0	0.00534842
2000	0.000707	0.000105	0.00432427	0	0	0.00513602
2100	0.00068	9.88e-05	0.00416295	0	0	0.00494162
2200	0.000655	9.33e-05	0.00401464	0	0	0.00476306
2300	0.000632	8.83e-05	0.00387761	0	0	0.00459826
2400	0.000611	8.38e-05	0.00375013	0	0	0.00444518
2500	0.000592	7.97e-05	0.00363047	0	0	0.00430184
2600	0.000573	7.6e-05	0.00351698	0	0	0.00416638
2700	0.000556	7.25e-05	0.003409	0	0	0.00403796
2800	0.000541	6.93e-05	0.00330656	0	0	0.00391645
2900	0.000526	6.64e-05	0.00320972	0	0	0.00380177
3000	0.000512	6.37e-05	0.00311851	0	0	0.00369384
3100	0.000498	6.12e-05	0.003033	0	0	0.00359261
3200	0.000486	5.88e-05	0.00295322	0	0	0.00349803
3300	0.000474	5.66e-05	0.0028792	0	0	0.00341006
3400	0.000463	5.46e-05	0.00281062	0	0	0.00332829
3500	0.000452	5.27e-05	0.00274691	0	0	0.00325208
3600	0.000442	5.09e-05	0.00268748	0	0	0.00318081
3700	0.000433	4.92e-05	0.00263175	0	0	0.00311384
3800	0.000424	4.76e-05	0.00257914	0	0	0.00305054
3900	0.000415	4.61e-05	0.00252906	0	0	0.00299028
4000	0.000407	4.47e-05	0.00248095	0	0	0.00293246
4100	0.000399	4.34e-05	0.00243421	0	0	0.00287646
4200	0.000391	4.21e-05	0.00238842	0	0	0.00282181
4300	0.000384	4.09e-05	0.00234359	0	0	0.00276851
4400	0.000377	3.98e-05	0.0022998	0	0	0.00271661
4500	0.00037	3.87e-05	0.00225713	0	0	0.00266616
4600	0.000364	3.77e-05	0.00221565	0	0	0.00261723
4700	0.000358	3.67e-05	0.00217546	0	0	0.00256987
4800	0.000352	3.57e-05	0.00213662	0	0	0.00252414
4900	0.000346	3.48e-05	0.00209922	0	0	0.00248011
5000	0.000341	3.4e-05	0.00206334	0	0	0.00243785
5100	0.000335	3.32e-05	0.00202903	0	0	0.00239739
5200	0.00033	3.24e-05	0.00199623	0	0	0.00235866
5300	0.000325	3.16e-05	0.00196485	0	0	0.00232156
5400	0.00032	3.09e-05	0.00193478	0	0	0.00228596
5500	0.000316	3.02e-05	0.00190592	0	0	0.00225177
5600	0.000311	2.96e-05	0.00187819	0	0	0.00221887
5700	0.000307	2.89e-05	0.00185148	0	0	0.00218717
5800	0.000303	2.83e-05	0.0018257	0	0	0.00215655
5900	0.000298	2.77e-05	0.00180075	0	0	0.00212692
6000	0.000294	2.72e-05	0.00177652	0	0	0.00209816
6100	0.000291	2.66e-05	0.00175293	0	0	0.00207017
6200	0.000287	2.61e-05	0.00172988	0	0	0.00204285
6300	0.000283	2.56e-05	0.00170727	0	0	0.00201609
6400	0.00028	2.51e-05	0.00168505	0	0	0.00198985
6500	0.000276	2.46e-05	0.00166323	0	0	0.00196412
6600	0.000273	2.42e-05	0.0016418	0	0	0.00193889
6700	0.00027	2.37e-05	0.00162074	0	0	0.00191414
6800	0.000267	2.33e-05	0.00160007	0	0	0.00188988
6900	0.000263	2.29e-05	0.00157977	0	0	0.00186608
7000	0.00026	2.25e-05	0.00155985	0	0	0.00184275
7100	0.000257	2.21e-05	0.00154029	0	0	0.00181988
7200	0.000255	2.17e-05	0.00152109	0	0	0.00179745
7300	0.000252	2.13e-05	0.00150225	0	0	0.00177546
7400	0.000249	2.1e-05	0.00148377	0	0	0.00175391
7500	0.000246	2.07e-05	0.00146564	0	0	0.00173279
7600	0.000244	2.03e-05	0.00144786	0	0	0.00171208
7700	0.000241	2e-05	0.00143042	0	0	0.00169179
7800	0.000239	1.97e-05	0.00141331	0	0	0.0016719
7900	0.000236	1.94e-05	0.00139655	0	0	0.00165242
8000	0.000234	1.91e-05	0.00138011	0	0	0.00163332
8100	0.000232	1.88e-05	0.001364	0	0	0.00161462
8200	0.00023	1.85e-05	0.00134821	0	0	0.0015963
8300	0.000227	1.82e-05	0.00133274	0	0	0.00157835
8400	0.000225	1.8e-05	0.00131759	0	0	0.00156077
8500	0.000223	1.77e-05	0.00130275	0	0	0.00154355
8600	0.000221	1.75e-05	0.00128821	0	0	0.00152669
8700	0.000219	1.72e-05	0.00127398	0	0	0.00151018
8800	0.000217	1.7e-05	0.00126004	0	0	0.00149402
8900	0.000215	1.67e-05	0.0012464	0	0	0.0014782
9000	0.000213	1.65e-05	0.00123305	0	0	0.00146271
9100	0.000211	1.63e-05	0.00121998	0	0	0.00144756
9200	0.000209	1.61e-05	0.0012072	0	0	0.00143272
9300	0.000208	1.59e-05	0.00119469	0	0	0.00141821
9400	0.000206	1.57e-05	0.00118246	0	0	0.00140401
9500	0.000204	1.55e-05	0.0011705	0	0	0.00139012
9600	0.000202	1.53e-05	0.0011588	0	0	0.00137653
9700	0.000201	1.51e-05	0.00114737	0	0	0.00136324
9800	0.000199	1.49e-05	0.0011362	0	0	0.00135024
9900	0.000198	1.47e-05	0.00112528	0	0	0.00133753
10000	0.000196	1.45e-05	0.0011146	0	0	0.0013251

## Sheet: 2
Polar angle (deg)	norm. ADCS (up to 10 eV)	Polar angle (deg)	norm. ADCS (up to 100 eV)	Polar angle (deg)	norm. ADCS (above 100 eV)
2.42945	0.99495	1.8773	0.986869	1.43558	0.964646
3.64417	0.980808	3.64417	0.935354	2.53988	0.871717
6.07362	0.944444	5.85276	0.846465	3.20245	0.79495
9.05521	0.875758	7.39877	0.759596	3.97546	0.687879
11.4847	0.8	8.94479	0.666667	4.52761	0.588889
13.2515	0.740404	10.4908	0.566667	4.8589	0.507071
16.1227	0.637374	12.0368	0.472727	5.6319	0.410101
18.773	0.541414	13.0307	0.39697	6.18405	0.313131
21.5337	0.440404	14.6871	0.310101	7.06748	0.214141
24.184	0.344444	16.2331	0.235354	7.95092	0.122222
26.5031	0.269697	17.7791	0.167677	9.49693	0.039394
30.0368	0.171717	20.4294	0.0868687	11.4847	0.00707076
33.9018	0.0929292	22.5276	0.0454545	15.681	0.0212122
39.865	0.0242424	25.5092	0.0131313	18.773	0.0121212
47.7055	0.00505049	29.1534	0.0121212	25.2883	0.00404042
55.4356	0.0121212	33.2393	0.00707076	30	0.001
64.2699	0.0161617	37.7669	0.0111111	40	0.001
73.3252	0.0131313	41.3006	0.0151515	50	0.001
83.3742	0.00808083	46.2699	0.00909091	60	0.001
96.184	0.0131313	49.4724	0.00707076	70	0.001
103.693	0.0141414	55.8773	0.0121212	80	0.001
118.38	0.00707076	63.2761	0.0121212	90	0.001
131.411	0.010101	70.7853	0.00909091	100	0.001
148.307	0.00606057	78.7362	0.00606057	110	0.001
158.577	0.00707076	91.3251	0.00808083	120	0
163.325	0.020202	105.35	0.00808083	130	0
170.945	0.0414141	132.515	0.00606057	140	0
176.466	0.0545455	179.779	0.00202015	150	0
179.337	0.0585859			179.779	0

## Sheet: 3
E0 (eV)	OELF (Im(-1/eps(k=0)))
0.200004	0.0248837
0.400008	0.00785793
0.600012	0.00288603
0.800016	0.000873035
1.00002	0
1.20002	0
1.40003	0
1.60003	0
1.80004	0
2.00004	0
2.20004	0.000178634
2.40005	0.000339589
2.60005	0.000470181
2.80006	0.000561323
3.00006	0.000606352
3.20006	0.000600272
3.40007	0.000539261
3.60007	0.000420347
3.80008	0.000241182
4.00008	0
4.20008	0
4.40009	0
4.60009	0
4.8001	0
5.0001	0
5.2001	0
5.40011	0
5.60011	0
5.80012	0
6.00012	0
6.20012	0.000709273
6.40013	0.00131
6.60013	0.0015412
6.80014	0.00117224
7.00014	0
7.20014	0
7.40015	0.00891939
7.60015	0.0260398
7.80016	0.0507395
8.00016	0.0824288
8.20016	0.0964953
8.40017	0.117744
8.60017	0.122654
8.80018	0.112368
9.00018	0.102551
9.20018	0.100327
9.40019	0.105216
9.60019	0.116755
9.8002	0.121105
10.0002	0.138466
10.2002	0.145922
10.4002	0.145805
10.6002	0.147815
10.8002	0.15262
11.0002	0.158773
11.2002	0.164829
11.4002	0.170043
11.6002	0.176198
11.8002	0.184547
12.0002	0.1923
12.2002	0.197165
12.4002	0.202048
12.6003	0.21015
12.8003	0.221496
13.0003	0.235203
13.2003	0.24975
13.4003	0.263699
13.6003	0.276336
13.8003	0.287877
14.0003	0.301412
14.2003	0.319304
14.4003	0.338829
14.6003	0.356441
14.8003	0.369752
15.0003	0.378079
15.2003	0.386046
15.4003	0.397635
15.6003	0.40996
15.8003	0.419789
16.0003	0.428553
16.2003	0.437909
16.4003	0.446238
16.6003	0.452296
16.8003	0.459163
17.0003	0.469795
17.2003	0.482992
17.4003	0.496724
17.6004	0.509472
17.8004	0.520449
18.0004	0.531114
18.2004	0.542927
18.4004	0.555403
18.6004	0.568058
18.8004	0.582168
19.0004	0.598108
19.2004	0.611235
19.4004	0.617432
19.6004	0.618926
19.8004	0.619049
20.0004	0.619735
20.2004	0.622115
20.4004	0.62565
20.6004	0.629421
20.8004	0.632546
21.0004	0.634175
21.2004	0.6337
21.4004	0.631356
21.6004	0.627573
21.8004	0.622762
22.0004	0.617322
22.2004	0.611564
22.4004	0.605491
22.6005	0.599039
22.8005	0.592144
23.0005	0.584744
23.2005	0.576826
23.4005	0.568569
23.6005	0.560189
23.8005	0.551897
24.0005	0.543895
24.2005	0.536309
24.4005	0.528978
24.6005	0.521679
24.8005	0.514194
25.0005	0.506314
25.2005	0.497897
25.4005	0.489047
25.6005	0.479924
25.8005	0.470685
26.0005	0.461479
26.2005	0.452486
26.4005	0.444008
26.6005	0.43637
26.8005	0.429886
27.0005	0.424864
27.2005	0.421417
27.4005	0.418934
27.6006	0.416647
27.8006	0.413807
28.0006	0.409687
28.2006	0.403844
28.4006	0.396872
28.6006	0.389601
28.8006	0.38284
29.0006	0.377373
29.2006	0.373748
29.4006	0.371638
29.6006	0.370516
29.8006	0.36987
30.0006	0.3692
30.2006	0.368108
30.4006	0.366562
30.6006	0.364616
30.8006	0.362322
31.0006	0.359732
31.2006	0.356897
31.4006	0.353864
31.6006	0.350683
31.8006	0.347398
32.0006	0.344056
32.2006	0.340694
32.4006	0.337321
32.6007	0.333939
32.8007	0.330552
33.0007	0.327162
33.2007	0.32377
33.4007	0.320381
33.6007	0.316995
33.8007	0.313614
34.0007	0.310242
34.2007	0.306878
34.4007	0.303509
34.6007	0.30012
34.8007	0.296697
35.0007	0.293227
35.2007	0.289695
35.4007	0.286088
35.6007	0.282394
35.8007	0.278598
36.0007	0.27469
36.2007	0.270665
36.4007	0.266561
36.6007	0.262421
36.8007	0.258287
37.0007	0.254204
37.2007	0.250211
37.4007	0.246349
37.6008	0.242659
37.8008	0.239178
38.0008	0.235944
38.2008	0.232985
38.4008	0.230279
38.6008	0.227797
38.8008	0.225508
39.0008	0.223384
39.2008	0.221397
39.4008	0.219518
39.6008	0.217721
39.8008	0.215977
40.0008	0.214262
40.2008	0.212553
40.4008	0.210839
40.6008	0.209114
40.8008	0.207372
41.0008	0.205607
41.2008	0.203811
41.4008	0.20198
41.6008	0.200106
41.8008	0.198184
42.0008	0.196209
42.2008	0.194177
42.4008	0.192099
42.6009	0.189988
42.8009	0.187856
43.0009	0.185715
43.2009	0.183578
43.4009	0.181457
43.6009	0.179363
43.8009	0.177308
44.0009	0.175302
44.2009	0.173355
44.4009	0.171464
44.6009	0.169621
44.8009	0.167823
45.0009	0.166062
45.2009	0.164335
45.4009	0.162635
45.6009	0.160958
45.8009	0.159297
46.0009	0.157649
46.2009	0.156009
46.4009	0.154385
46.6009	0.152784
46.8009	0.151213
47.0009	0.14968
47.2009	0.148193
47.4009	0.146758
47.601	0.145383
47.801	0.144075
48.001	0.14284
48.201	0.141682
48.401	0.140585
48.601	0.139532
48.801	0.138502
49.001	0.13748
49.201	0.136446
49.401	0.135383
49.601	0.134274
49.801	0.133102
50.001	0.131851
50.201	0.13051
50.401	0.129089
50.601	0.127602
50.801	0.126067
51.001	0.124497
51.201	0.122907
51.401	0.121312
51.601	0.119726
51.801	0.118162
52.001	0.116636
52.201	0.115158
52.401	0.113736
52.6011	0.112376
52.8011	0.111081
53.0011	0.109859
53.2011	0.108713
53.4011	0.107648
53.6011	0.10667
53.8011	0.105784
54.0011	0.104994
54.2011	0.1043
54.4011	0.103684
54.6011	0.103123
54.8011	0.102595
55.0011	0.102077
55.2011	0.101547
55.4011	0.100985
55.6011	0.100368
55.8011	0.0996763
56.0011	0.0988887
56.2011	0.0979915
56.4011	0.0969961
56.6011	0.0959196
56.8011	0.0947792
57.0011	0.0935916
57.2011	0.0923736
57.4011	0.0911413
57.6012	0.089911
57.8012	0.0886986
58.0012	0.0875197
58.2012	0.0863867
58.4012	0.0853004
58.6012	0.0842582
58.8012	0.0832579
59.0012	0.0822973
59.2012	0.0813741
59.4012	0.080486
59.6012	0.0796309
59.8012	0.0788067
60.0012	0.0780112
60.2012	0.0772428
60.4012	0.0765012
60.6012	0.0757866
60.8012	0.0750994
61.0012	0.0744398
61.2012	0.0738078
61.4012	0.0732039
61.6012	0.072628
61.8012	0.0720806
62.0012	0.0715617
62.2012	0.0710716
62.4012	0.0706105
62.6013	0.0701786
62.8013	0.069776
63.0013	0.069403
63.2013	0.0690598
63.4013	0.0687464
63.6013	0.0684632
63.8013	0.0682103
64.0013	0.0679879
64.2013	0.067795
64.4013	0.0676265
64.6013	0.0674762
64.8013	0.0673378
65.0013	0.0672055
65.2013	0.0670732
65.4013	0.066935
65.6013	0.0667851
65.8013	0.0666177
66.0013	0.0664271
66.2013	0.0662078
66.4013	0.0659542
66.6013	0.0656608
66.8013	0.0653222
67.0013	0.064933
67.2013	0.064488
67.4013	0.0639818
67.6014	0.0634095
67.8014	0.0627657
68.0014	0.0620456
68.2014	0.0612466
68.4014	0.0603762
68.6014	0.059444
68.8014	0.0584597
69.0014	0.0574326
69.2014	0.0563723
69.4014	0.0552879
69.6014	0.0541887
69.8014	0.0530836
70.0014	0.0519817
70.2014	0.0508918
70.4014	0.0498225
70.6014	0.0487827
70.8014	0.0477808
71.0014	0.0468253
71.2014	0.0459245
71.4014	0.0450868
71.6014	0.0443202
71.8014	0.043633
72.0014	0.043033
72.2014	0.0425252
72.4014	0.0421031
72.6015	0.0417574
72.8015	0.0414788
73.0015	0.0412584
73.2015	0.041087
73.4015	0.0409559
73.6015	0.0408562
73.8015	0.0407792
74.0015	0.0407162
74.2015	0.0406589
74.4015	0.0405987
74.6015	0.0405274
74.8015	0.0404367
75.0015	0.0403183
75.2015	0.0401644
75.4015	0.0399668
75.6015	0.0397177
75.8015	0.0394093
76.0015	0.0390338
76.2015	0.0385862
76.4015	0.0380723
76.6015	0.0375002
76.8015	0.0368779
77.0015	0.0362134
77.2015	0.0355147
77.4015	0.0347895
77.6016	0.0340456
77.8016	0.0332906
78.0016	0.0325321
78.2016	0.0317776
78.4016	0.0310346
78.6016	0.0303104
78.8016	0.0296122
79.0016	0.0289473
79.2016	0.0283228
79.4016	0.0277457
79.6016	0.0272231
79.8016	0.0267618
80.0016	0.0263687
80.2016	0.0260483
80.4016	0.0257956
80.6016	0.0256035
80.8016	0.0254652
81.0016	0.0253737
81.2016	0.0253221
81.4016	0.0253037
81.6016	0.0253118
81.8016	0.0253396
82.0016	0.0253807
82.2016	0.0254284
82.4016	0.0254764
82.6017	0.0255182
82.8017	0.0255475
83.0017	0.0255581
83.2017	0.0255437
83.4017	0.0254981
83.6017	0.0254154
83.8017	0.0252893
84.0017	0.0251141
84.2017	0.0248856
84.4017	0.024607
84.6017	0.0242833
84.8017	0.0239195
85.0017	0.0235204
85.2017	0.0230908
85.4017	0.0226355
85.6017	0.0221593
85.8017	0.0216669
86.0017	0.0211629
86.2017	0.020652
86.4017	0.0201386
86.6017	0.0196273
86.8017	0.0191227
87.0017	0.018629
87.2017	0.0181508
87.4017	0.0176925
87.6018	0.0172582
87.8018	0.0168523
88.0018	0.0164791
88.2018	0.0161416
88.4018	0.0158385
88.6018	0.0155673
88.8018	0.0153257
89.0018	0.0151113
89.2018	0.0149217
89.4018	0.0147547
89.6018	0.014608
89.8018	0.0144792
90.0018	0.0143661
90.2018	0.0142664
90.4018	0.014178
90.6018	0.0140986
90.8018	0.0140261
91.0018	0.0139583
91.2018	0.013893
91.4018	0.0138281
91.6018	0.0137615
91.8018	0.0136912
92.0018	0.013615
92.2018	0.0135314
92.4018	0.0134403
92.6019	0.0133421
92.8019	0.0132374
93.0019	0.0131264
93.2019	0.0130097
93.4019	0.0128875
93.6019	0.0127604
93.8019	0.0126286
94.0019	0.0124927
94.2019	0.0123529
94.4019	0.0122098
94.6019	0.0120636
94.8019	0.0119147
95.0019	0.0117635
95.2019	0.0116105
95.4019	0.0114559
95.6019	0.0113002
95.8019	0.0111436
96.0019	0.0109867
96.2019	0.0108296
96.4019	0.0106731
96.6019	0.0105177
96.8019	0.0103639
97.0019	0.0102123
97.2019	0.0100634
97.4019	0.00991787
97.602	0.00977619
97.802	0.00963891
98.002	0.00950657
98.202	0.0093797
98.402	0.00925883
98.602	0.0091445
98.802	0.00903721
99.002	0.0089375
99.202	0.00884586
99.402	0.00876282
99.602	0.00868888
99.802	0.00862453
100.002	0.00905425
100.202	0.00899293
100.402	0.00893205
100.602	0.00887163
100.802	0.00881165
101.002	0.00875211
101.202	0.008693
101.402	0.00863433
101.602	0.00857609
101.802	0.00851827
102.002	0.00846088
102.202	0.0084039
102.402	0.00834734
102.602	0.00829119
102.802	0.00823545
103.002	0.00818012
103.202	0.00812519
103.402	0.00807066
103.602	0.00801652
103.802	0.00796278
104.002	0.00790943
104.202	0.00785646
104.402	0.00780388
104.602	0.00775168
104.802	0.00769985
105.002	0.0076484
105.202	0.00759732
105.402	0.00754661
105.602	0.00749626
105.802	0.00744628
106.002	0.00739666
106.202	0.00734739
106.402	0.00729848
106.602	0.00724992
106.802	0.0072017
107.002	0.00715384
107.202	0.00710631
107.402	0.00705913
107.602	0.00701228
107.802	0.00696577
108.002	0.00691959
108.202	0.00687374
108.402	0.00682822
108.602	0.00678303
108.802	0.00673815
109.002	0.00669359
109.202	0.00664935
109.402	0.00660543
109.602	0.00656182
109.802	0.00651852
110.002	0.00647552
110.202	0.00643283
110.402	0.00639044
110.602	0.00634835
110.802	0.00630656
111.002	0.00626507
111.202	0.00622387
111.402	0.00618296
111.602	0.00614234
111.802	0.006102
112.002	0.00606195
112.202	0.00602218
112.402	0.00598269
112.602	0.00594348
112.802	0.00590454
113.002	0.00586588
113.202	0.00582749
113.402	0.00578937
113.602	0.00575152
113.802	0.00571393
114.002	0.0056766
114.202	0.00563954
114.402	0.00560273
114.602	0.00556618
114.802	0.00552989
115.002	0.00549385
115.202	0.00545806
115.402	0.00542252
115.602	0.00538723
115.802	0.00535219
116.002	0.00531739
116.202	0.00528283
116.402	0.00524851
116.602	0.00521443
116.802	0.00518058
117.002	0.00514697
117.202	0.0051136
117.402	0.00508045
117.602	0.00504753
117.802	0.00501485
118.002	0.00498238
118.202	0.00495015
118.402	0.00491813
118.602	0.00488634
118.802	0.00485476
119.002	0.0048234
119.202	0.00479226
119.402	0.00476134
119.602	0.00473062
119.802	0.00470012
120.002	0.00466983
120.202	0.00463974
120.402	0.00460987
120.602	0.00458019
120.802	0.00455072
121.002	0.00452146
121.202	0.00449239
121.402	0.00446352
121.602	0.00443485
121.802	0.00440638
122.002	0.0043781
122.202	0.00435001
122.402	0.00432211
122.602	0.00429441
122.802	0.0042669
123.002	0.00423957
123.202	0.00421243
123.402	0.00418547
123.602	0.00415869
123.802	0.0041321
124.002	0.00410569
124.202	0.00407946
124.402	0.00405341
124.602	0.00402753
124.802	0.00400183
125.003	0.0039763
125.203	0.00395095
125.403	0.00392577
125.603	0.00390076
125.803	0.00387591
126.003	0.00385124
126.203	0.00382673
126.403	0.00380239
126.603	0.00377821
126.803	0.0037542
127.003	0.00373034
127.203	0.00370665
127.403	0.00368312
127.603	0.00365974
127.803	0.00363653
128.003	0.00361347
128.203	0.00359056
128.403	0.00356781
128.603	0.00354521
128.803	0.00352276
129.003	0.00350047
129.203	0.00347832
129.403	0.00345632
129.603	0.00343447
129.803	0.00341276
130.003	0.0033912
130.203	0.00336979
130.403	0.00334851
130.603	0.00332738
130.803	0.00330639
131.003	0.00328554
131.203	0.00326483
131.403	0.00324426
131.603	0.00322383
131.803	0.00320353
132.003	0.00318336
132.203	0.00316333
132.403	0.00314344
132.603	0.00312367
132.803	0.00310404
133.003	0.00308454
133.203	0.00306516
133.403	0.00304592
133.603	0.0030268
133.803	0.00300781
134.003	0.00298895
134.203	0.00297021
134.403	0.00295159
134.603	0.0029331
134.803	0.00291473
135.003	0.00289648
135.203	0.00287835
135.403	0.00286034
135.603	0.00284246
135.803	0.00282468
136.003	0.00280703
136.203	0.00278949
136.403	0.00277207
136.603	0.00275476
136.803	0.00273757
137.003	0.00272049
137.203	0.00270352
137.403	0.00268666
137.603	0.00266992
137.803	0.00265328
138.003	0.00263676
138.203	0.00262034
138.403	0.00260403
138.603	0.00258782
138.803	0.00257173
139.003	0.00255573
139.203	0.00253985
139.403	0.00252406
139.603	0.00250838
139.803	0.00249281
140.003	0.00247733
140.203	0.00246196
140.403	0.00244668
140.603	0.00243151
140.803	0.00241643
141.003	0.00240145
141.203	0.00238657
141.403	0.00237179
141.603	0.00235711
141.803	0.00234251
142.003	0.00232802
142.203	0.00231362
142.403	0.00229931
142.603	0.00228509
142.803	0.00227097
143.003	0.00225694
143.203	0.002243
143.403	0.00222915
143.603	0.00221539
143.803	0.00220172
144.003	0.00218814
144.203	0.00217465
144.403	0.00216124
144.603	0.00214792
144.803	0.00213469
145.003	0.00212154
145.203	0.00210848
145.403	0.0020955
145.603	0.0020826
145.803	0.00206979
146.003	0.00205706
146.203	0.00204442
146.403	0.00203185
146.603	0.00201937
146.803	0.00200697
147.003	0.00199464
147.203	0.0019824
147.403	0.00197023
147.603	0.00195814
147.803	0.00194614
148.003	0.0019342
148.203	0.00192235
148.403	0.00191057
148.603	0.00189886
148.803	0.00188724
149.003	0.00187568
149.203	0.0018642
149.403	0.00185279
149.603	0.00184146
149.803	0.0018302
150.003	0.00181901
150.203	0.00180789
150.403	0.00179685
150.603	0.00178587
150.803	0.00177497
151.003	0.00176413
151.203	0.00175337
151.403	0.00174267
151.603	0.00173204
151.803	0.00172148
152.003	0.00171098
152.203	0.00170056
152.403	0.0016902
152.603	0.0016799
152.803	0.00166967
153.003	0.00165951
153.203	0.00164941
153.403	0.00163938
153.603	0.0016294
153.803	0.0016195
154.003	0.00160965
154.203	0.00159987
154.403	0.00159015
154.603	0.00158049
154.803	0.00157089
155.003	0.00156136
155.203	0.00155188
155.403	0.00154247
155.603	0.00153311
155.803	0.00152381
156.003	0.00151458
156.203	0.0015054
156.403	0.00149628
156.603	0.00148721
156.803	0.00147821
157.003	0.00146926
157.203	0.00146036
157.403	0.00145153
157.603	0.00144275
157.803	0.00143402
158.003	0.00142535
158.203	0.00141673
158.403	0.00140817
158.603	0.00139967
158.803	0.00139121
159.003	0.00138281
159.203	0.00137446
159.403	0.00136617
159.603	0.00135793
159.803	0.00134973
160.003	0.0013416
160.203	0.00133351
160.403	0.00132547
160.603	0.00131748
160.803	0.00130955
161.003	0.00130166
161.203	0.00129382
161.403	0.00128603
161.603	0.00127829
161.803	0.0012706
162.003	0.00126296
162.203	0.00125536
162.403	0.00124782
162.603	0.00124032
162.803	0.00123286
163.003	0.00122546
163.203	0.0012181
163.403	0.00121078
163.603	0.00120352
163.803	0.00119629
164.003	0.00118911
164.203	0.00118198
164.403	0.00117489
164.603	0.00116785
164.803	0.00116085
165.003	0.00115389
165.203	0.00114698
165.403	0.00114011
165.603	0.00113328
165.803	0.0011265
166.003	0.00111975
166.203	0.00111305
166.403	0.00110639
166.603	0.00109978
166.803	0.0010932
167.003	0.00108666
167.203	0.00108017
167.403	0.00107372
167.603	0.0010673
167.803	0.00106093
168.003	0.00105459
168.203	0.0010483
168.403	0.00104204
168.603	0.00103582
168.803	0.00102964
169.003	0.0010235
169.203	0.0010174
169.403	0.00101133
169.603	0.00100531
169.803	0.000999315
170.003	0.000993362
170.203	0.000987445
170.403	0.000981566
170.603	0.000975722
170.803	0.000969915
171.003	0.000964144
171.203	0.000958408
171.403	0.000952708
171.603	0.000947043
171.803	0.000941412
172.003	0.000935817
172.203	0.000930256
172.403	0.000924729
172.603	0.000919237
172.803	0.000913778
173.003	0.000908353
173.203	0.000902962
173.403	0.000897603
173.603	0.000892278
173.803	0.000886985
174.003	0.000881725
174.203	0.000876497
174.403	0.000871301
174.603	0.000866138
174.803	0.000861006
175.004	0.000855905
175.204	0.000850836
175.404	0.000845798
175.604	0.000840791
175.804	0.000835815
176.004	0.000830869
176.204	0.000825954
176.404	0.000821068
176.604	0.000816213
176.804	0.000811387
177.004	0.000806591
177.204	0.000801825
177.404	0.000797087
177.604	0.000792379
177.804	0.000787699
178.004	0.000783048
178.204	0.000778425
178.404	0.000773831
178.604	0.000769265
178.804	0.000764726
179.004	0.000760216
179.204	0.000755732
179.404	0.000751277
179.604	0.000746848
179.804	0.000742447
180.004	0.000738072
180.204	0.000733724
180.404	0.000729403
180.604	0.000725107
180.804	0.000720839
181.004	0.000716596
181.204	0.000712379
181.404	0.000708187
181.604	0.000704021
181.804	0.000699881
182.004	0.000695765
182.204	0.000691675
182.404	0.00068761
182.604	0.000683569
182.804	0.000679553
183.004	0.000675561
183.204	0.000671594
183.404	0.00066765
183.604	0.000663731
183.804	0.000659835
184.004	0.000655963
184.204	0.000652114
184.404	0.000648289
184.604	0.000644487
184.804	0.000640708
185.004	0.000636952
185.204	0.000633219
185.404	0.000629508
185.604	0.00062582
185.804	0.000622154
186.004	0.000618511
186.204	0.000614889
186.404	0.000611289
186.604	0.000607711
186.804	0.000604155
187.004	0.00060062
187.204	0.000597107
187.404	0.000593615
187.604	0.000590144
187.804	0.000586693
188.004	0.000583264
188.204	0.000579856
188.404	0.000576467
188.604	0.0005731
188.804	0.000569753
189.004	0.000566425
189.204	0.000563118
189.404	0.000559831
189.604	0.000556564
189.804	0.000553316
190.004	0.000550088
190.204	0.00054688
190.404	0.00054369
190.604	0.00054052
190.804	0.000537369
191.004	0.000534237
191.204	0.000531124
191.404	0.00052803
191.604	0.000524954
191.804	0.000521896
192.004	0.000518857
192.204	0.000515836
192.404	0.000512834
192.604	0.000509849
192.804	0.000506882
193.004	0.000503933
193.204	0.000501002
193.404	0.000498089
193.604	0.000495193
193.804	0.000492314
194.004	0.000489452
194.204	0.000486608
194.404	0.00048378
194.604	0.00048097
194.804	0.000478177
195.004	0.0004754
195.204	0.000472639
195.404	0.000469896
195.604	0.000467168
195.804	0.000464458
196.004	0.000461763
196.204	0.000459084
196.404	0.000456422
196.604	0.000453775
196.804	0.000451144
197.004	0.000448529
197.204	0.000445929
197.404	0.000443345
197.604	0.000440776
197.804	0.000438223
198.004	0.000435685
198.204	0.000433162
198.404	0.000430654
198.604	0.000428161
198.804	0.000425683
199.004	0.00042322
199.204	0.000420772
199.404	0.000418338
199.604	0.000415918
199.804	0.000413513
200.004	0.000411122
200.204	0.000408746
200.404	0.000406383
200.604	0.000404035
200.804	0.000401701
201.004	0.00039938
201.204	0.000397073
201.404	0.00039478
201.604	0.000392501
201.804	0.000390235
202.004	0.000387983
202.204	0.000385744
202.404	0.000383518
202.604	0.000381306
202.804	0.000379106
203.004	0.00037692
203.204	0.000374747
203.404	0.000372586
203.604	0.000370439
203.804	0.000368304
204.004	0.000366182
204.204	0.000364072
204.404	0.000361975
204.604	0.00035989
204.804	0.000357818
205.004	0.000355758
205.204	0.00035371
205.404	0.000351674
205.604	0.00034965
205.804	0.000347639
206.004	0.000345639
206.204	0.000343651
206.404	0.000341675
206.604	0.00033971
206.804	0.000337757
207.004	0.000335816
207.204	0.000333886
207.404	0.000331967
207.604	0.00033006
207.804	0.000328164
208.004	0.000326279
208.204	0.000324406
208.404	0.000322543
208.604	0.000320691
208.804	0.000318851
209.004	0.000317021
209.204	0.000315202
209.404	0.000313394
209.604	0.000311596
209.804	0.000309809
210.004	0.000308032
210.204	0.000306266
210.404	0.000304511
210.604	0.000302765
210.804	0.00030103
211.004	0.000299306
211.204	0.000297591
211.404	0.000295886
211.604	0.000294192
211.804	0.000292507
212.004	0.000290832
212.204	0.000289168
212.404	0.000287513
212.604	0.000285867
212.804	0.000284232
213.004	0.000282606
213.204	0.000280989
213.404	0.000279382
213.604	0.000277784
213.804	0.000276196
214.004	0.000274617
214.204	0.000273048
214.404	0.000271487
214.604	0.000269936
214.804	0.000268394
215.004	0.000266861
215.204	0.000265337
215.404	0.000263821
215.604	0.000262315
215.804	0.000260818
216.004	0.000259329
216.204	0.000257849
216.404	0.000256378
216.604	0.000254915
216.804	0.000253461
217.004	0.000252015
217.204	0.000250578
217.404	0.000249149
217.604	0.000247729
217.804	0.000246316
218.004	0.000244913
218.204	0.000243517
218.404	0.000242129
218.604	0.00024075
218.804	0.000239379
219.004	0.000238015
219.204	0.00023666
219.404	0.000235313
219.604	0.000233973
219.804	0.000232641
220.004	0.000231317
220.204	0.000230001
220.404	0.000228692
220.604	0.000227391
220.804	0.000226098
221.004	0.000224812
221.204	0.000223534
221.404	0.000222263
221.604	0.000220999
221.804	0.000219743
222.004	0.000218495
222.204	0.000217253
222.404	0.000216019
222.604	0.000214792
222.804	0.000213572
223.004	0.000212359
223.204	0.000211153
223.404	0.000209954
223.604	0.000208762
223.804	0.000207577
224.004	0.000206399
224.204	0.000205228
224.404	0.000204064
224.604	0.000202906
224.804	0.000201756
225.005	0.000200611
225.205	0.000199474
225.405	0.000198343
225.605	0.000197219
225.805	0.000196101
226.005	0.000194989
226.205	0.000193885
226.405	0.000192786
226.605	0.000191694
226.805	0.000190608
227.005	0.000189529
227.205	0.000188456
227.405	0.000187389
227.605	0.000186328
227.805	0.000185273
228.005	0.000184225
228.205	0.000183182
228.405	0.000182146
228.605	0.000181115
228.805	0.000180091
229.005	0.000179072
229.205	0.00017806
229.405	0.000177053
229.605	0.000176052
229.805	0.000175057
230.005	0.000174067
230.205	0.000173084
230.405	0.000172106
230.605	0.000171134
230.805	0.000170167
231.005	0.000169206
231.205	0.00016825
231.405	0.0001673
231.605	0.000166356
231.805	0.000165416
232.005	0.000164483
232.205	0.000163555
232.405	0.000162632
232.605	0.000161714
232.805	0.000160802
233.005	0.000159895
233.205	0.000158993
233.405	0.000158096
233.605	0.000157205
233.805	0.000156319
234.005	0.000155437
234.205	0.000154561
234.405	0.00015369
234.605	0.000152824
234.805	0.000151963
235.005	0.000151107
235.205	0.000150256
235.405	0.00014941
235.605	0.000148568
235.805	0.000147732
236.005	0.0001469
236.205	0.000146073
236.405	0.000145251
236.605	0.000144434
236.805	0.000143621
237.005	0.000142813
237.205	0.00014201
237.405	0.000141211
237.605	0.000140417
237.805	0.000139627
238.005	0.000138842
238.205	0.000138061
238.405	0.000137285
238.605	0.000136514
238.805	0.000135746
239.005	0.000134984
239.205	0.000134225
239.405	0.000133471
239.605	0.000132721
239.805	0.000131976
240.005	0.000131235
240.205	0.000130498
240.405	0.000129765
240.605	0.000129037
240.805	0.000128313
241.005	0.000127592
241.205	0.000126876
241.405	0.000126164
241.605	0.000125457
241.805	0.000124753
242.005	0.000124053
242.205	0.000123357
242.405	0.000122666
242.605	0.000121978
242.805	0.000121294
243.005	0.000120614
243.205	0.000119938
243.405	0.000119266
243.605	0.000118598
243.805	0.000117933
244.005	0.000117273
244.205	0.000116616
244.405	0.000115963
244.605	0.000115313
244.805	0.000114667
245.005	0.000114025
245.205	0.000113387
245.405	0.000112752
245.605	0.000112121
245.805	0.000111494
246.005	0.00011087
246.205	0.00011025
246.405	0.000109633
246.605	0.00010902
246.805	0.00010841
247.005	0.000107804
247.205	0.000107201
247.405	0.000106602
247.605	0.000106006
247.805	0.000105413
248.005	0.000104824
248.205	0.000104238
248.405	0.000103656
248.605	0.000103077
248.805	0.000102501
249.005	0.000101928
249.205	0.000101359
249.405	0.000100793
249.605	0.00010023
249.805	9.96704e-05
250.005	9.9114e-05
250.205	9.85608e-05
250.405	9.80107e-05
250.605	9.74637e-05
250.805	9.69199e-05
251.005	9.63791e-05
251.205	9.58414e-05
251.405	9.53068e-05
251.605	9.47752e-05
251.805	9.42467e-05
252.005	9.37211e-05
252.205	9.31986e-05
252.405	9.2679e-05
252.605	9.21624e-05
252.805	9.16487e-05
253.005	9.11379e-05
253.205	9.063e-05
253.405	9.01251e-05
253.605	8.9623e-05
253.805	8.91237e-05
254.005	8.86273e-05
254.205	8.81337e-05
254.405	8.76429e-05
254.605	8.71549e-05
254.805	8.66696e-05
255.005	8.61871e-05
255.205	8.57074e-05
255.405	8.52303e-05
255.605	8.4756e-05
255.805	8.42844e-05
256.005	8.38155e-05
256.205	8.33492e-05
256.405	8.28855e-05
256.605	8.24245e-05
256.805	8.19661e-05
257.005	8.15103e-05
257.205	8.10571e-05
257.405	8.06064e-05
257.605	8.01583e-05
257.805	7.97128e-05
258.005	7.92697e-05
258.205	7.88292e-05
258.405	7.83912e-05
258.605	7.79556e-05
258.805	7.75225e-05
259.005	7.70919e-05
259.205	7.66637e-05
259.405	7.62379e-05
259.605	7.58146e-05
259.805	7.53936e-05
260.005	7.4975e-05
260.205	7.45588e-05
260.405	7.4145e-05
260.605	7.37334e-05
260.805	7.33242e-05
261.005	7.29174e-05
261.205	7.25128e-05
261.405	7.21105e-05
261.605	7.17105e-05
261.805	7.13127e-05
262.005	7.09172e-05
262.205	7.05239e-05
262.405	7.01329e-05
262.605	6.9744e-05
262.805	6.93574e-05
263.005	6.89729e-05
263.205	6.85906e-05
263.405	6.82105e-05
263.605	6.78325e-05
263.805	6.74567e-05
264.005	6.70829e-05
264.205	6.67113e-05
264.405	6.63418e-05
264.605	6.59743e-05
264.805	6.5609e-05
265.005	6.52456e-05
265.205	6.48844e-05
265.405	6.45252e-05
265.605	6.4168e-05
265.805	6.38128e-05
266.005	6.34596e-05
266.205	6.31084e-05
266.405	6.27592e-05
266.605	6.24119e-05
266.805	6.20666e-05
267.005	6.17233e-05
267.205	6.13819e-05
267.405	6.10424e-05
267.605	6.07048e-05
267.805	6.03691e-05
268.005	6.00354e-05
268.205	5.97034e-05
268.405	5.93734e-05
268.605	5.90452e-05
268.805	5.87189e-05
269.005	5.83944e-05
269.205	5.80717e-05
269.405	5.77508e-05
269.605	5.74318e-05
269.805	5.71145e-05
270.005	5.6799e-05
270.205	5.64853e-05
270.405	5.61734e-05
270.605	5.58632e-05
270.805	5.55548e-05
271.005	5.52481e-05
271.205	5.49431e-05
271.405	5.46398e-05
271.605	5.43382e-05
271.805	5.40383e-05
272.005	5.37402e-05
272.205	5.34436e-05
272.405	5.31488e-05
272.605	5.28556e-05
272.805	5.2564e-05
273.005	5.22741e-05
273.205	5.19858e-05
273.405	5.16991e-05
273.605	5.14141e-05
273.805	5.11306e-05
274.005	5.08487e-05
274.205	5.05684e-05
274.405	5.02897e-05
274.605	5.00126e-05
274.805	4.9737e-05
275.006	4.94629e-05
275.206	4.91904e-05
275.406	4.89194e-05
275.606	4.86499e-05
275.806	4.83819e-05
276.006	4.81155e-05
276.206	4.78505e-05
276.406	4.7587e-05
276.606	4.7325e-05
276.806	4.70644e-05
277.006	4.68053e-05
277.206	4.65477e-05
277.406	4.62915e-05
277.606	4.60367e-05
277.806	4.57834e-05
278.006	4.55315e-05
278.206	4.5281e-05
278.406	4.50319e-05
278.606	4.47842e-05
278.806	4.45378e-05
279.006	4.42929e-05
279.206	4.40493e-05
279.406	4.38071e-05
279.606	4.35662e-05
279.806	4.33267e-05
280.006	4.30885e-05
280.206	4.28517e-05
280.406	4.26162e-05
280.606	4.23819e-05
280.806	4.2149e-05
281.006	4.19174e-05
281.206	4.16871e-05
281.406	4.14581e-05
281.606	4.12304e-05
281.806	4.10039e-05
282.006	4.07787e-05
282.206	4.05548e-05
282.406	4.03321e-05
282.606	4.01106e-05
282.806	3.98904e-05
283.006	3.96714e-05
283.206	3.94536e-05
283.406	3.92371e-05
283.606	3.90218e-05
283.806	3.88076e-05
284.006	3.85947e-05
284.206	3.83829e-05
284.406	3.81723e-05
284.606	3.79629e-05
284.806	3.77547e-05
285.006	3.75476e-05
285.206	3.73417e-05
285.406	3.71369e-05
285.606	3.69333e-05
285.806	3.67308e-05
286.006	3.65294e-05
286.206	3.63292e-05
286.406	3.613e-05
286.606	3.5932e-05
286.806	3.57351e-05
287.006	3.55392e-05
287.206	3.53445e-05
287.406	3.51509e-05
287.606	3.49583e-05
287.806	3.47668e-05
288.006	3.45763e-05
288.206	3.4387e-05
288.406	3.41986e-05
288.606	3.40114e-05
288.806	3.38251e-05
289.006	3.36399e-05
289.206	3.34558e-05
289.406	3.32726e-05
289.606	3.30905e-05
289.806	3.29094e-05
290.006	3.27293e-05
290.206	3.25502e-05
290.406	3.23721e-05
290.606	3.2195e-05
290.806	3.20188e-05
291.006	3.18437e-05
291.206	3.16695e-05
291.406	3.14963e-05
291.606	3.1324e-05
291.806	3.11527e-05
292.006	3.09824e-05
292.206	3.0813e-05
292.406	3.06445e-05
292.606	3.0477e-05
292.806	3.03104e-05
293.006	3.01447e-05
293.206	2.998e-05
293.406	2.98161e-05
293.606	2.96532e-05
293.806	2.94912e-05
294.006	2.93301e-05
294.206	2.91698e-05
294.406	2.90105e-05
294.606	2.8852e-05
294.806	2.86945e-05
295.006	2.85378e-05
295.206	2.83819e-05
295.406	2.8227e-05
295.606	2.80728e-05
295.806	2.79196e-05
296.006	2.77672e-05
296.206	2.76156e-05
296.406	2.74649e-05
296.606	2.7315e-05
296.806	2.71659e-05
297.006	2.70177e-05
297.206	2.68703e-05
297.406	2.67237e-05
297.606	2.65779e-05
297.806	2.64329e-05
298.006	2.62888e-05
298.206	2.61454e-05
298.406	2.60028e-05
298.606	2.5861e-05
298.806	2.572e-05
299.006	2.55798e-05
299.206	2.54403e-05
299.406	2.53016e-05
299.606	2.51637e-05
299.806	2.50266e-05
300.006	2.48902e-05
300.206	2.47545e-05
300.406	2.46197e-05
300.606	2.44855e-05
300.806	2.43521e-05
301.006	2.42195e-05
301.206	2.40875e-05
301.406	2.39563e-05
301.606	2.38258e-05
301.806	2.36961e-05
302.006	2.35671e-05
302.206	2.34387e-05
302.406	2.33111e-05
302.606	2.31842e-05
302.806	2.3058e-05
303.006	2.29325e-05
303.206	2.28077e-05
303.406	2.26835e-05
303.606	2.25601e-05
303.806	2.24373e-05
304.006	2.23152e-05
304.206	2.21938e-05
304.406	2.20731e-05
304.606	2.1953e-05
304.806	2.18336e-05
305.006	2.17149e-05
305.206	2.15968e-05
305.406	2.14793e-05
305.606	2.13625e-05
305.806	2.12464e-05
306.006	2.11308e-05
306.206	2.1016e-05
306.406	2.09017e-05
306.606	2.07881e-05
306.806	2.06751e-05
307.006	2.05628e-05
307.206	2.0451e-05
307.406	2.03399e-05
307.606	2.02294e-05
307.806	2.01195e-05
308.006	2.00102e-05
308.206	1.99015e-05
308.406	1.97934e-05
308.606	1.96859e-05
308.806	1.95789e-05
309.006	1.94726e-05
309.206	1.93669e-05
309.406	1.92617e-05
309.606	1.91571e-05
309.806	1.90531e-05
310.006	1.89497e-05
310.206	1.88468e-05
310.406	1.87446e-05
310.606	1.86428e-05
310.806	1.85417e-05
311.006	1.8441e-05
311.206	1.8341e-05
311.406	1.82415e-05
311.606	1.81425e-05
311.806	1.80441e-05
312.006	1.79462e-05
312.206	1.78489e-05
312.406	1.77521e-05
312.606	1.76558e-05
312.806	1.756e-05
313.006	1.74648e-05
313.206	1.73701e-05
313.406	1.7276e-05
313.606	1.71823e-05
313.806	1.70892e-05
314.006	1.69965e-05
314.206	1.69044e-05
314.406	1.68128e-05
314.606	1.67217e-05
314.806	1.66311e-05
315.006	1.6541e-05
315.206	1.64514e-05
315.406	1.63622e-05
315.606	1.62736e-05
315.806	1.61854e-05
316.006	1.60978e-05
316.206	1.60106e-05
316.406	1.59239e-05
316.606	1.58377e-05
316.806	1.57519e-05
317.006	1.56666e-05
317.206	1.55818e-05
317.406	1.54975e-05
317.606	1.54136e-05
317.806	1.53301e-05
318.006	1.52472e-05
318.206	1.51646e-05
318.406	1.50826e-05
318.606	1.5001e-05
318.806	1.49198e-05
319.006	1.48391e-05
319.206	1.47588e-05
319.406	1.4679e-05
319.606	1.45996e-05
319.806	1.45206e-05
320.006	1.44421e-05
320.206	1.4364e-05
320.406	1.42863e-05
320.606	1.4209e-05
320.806	1.41322e-05
321.006	1.40558e-05
321.206	1.39798e-05
321.406	1.39042e-05
321.606	1.38291e-05
321.806	1.37543e-05
322.006	1.368e-05
322.206	1.36061e-05
322.406	1.35325e-05
322.606	1.34594e-05
322.806	1.33867e-05
323.006	1.33144e-05
323.206	1.32425e-05
323.406	1.31709e-05
323.606	1.30998e-05
323.806	1.3029e-05
324.006	1.29587e-05
324.206	1.28887e-05
324.406	1.28191e-05
324.606	1.27499e-05
324.806	1.2681e-05
325.007	1.26126e-05
325.207	1.25445e-05
325.407	1.24768e-05
325.607	1.24094e-05
325.807	1.23424e-05
326.007	1.22758e-05
326.207	1.22096e-05
326.407	1.21437e-05
326.607	1.20782e-05
326.807	1.2013e-05
327.007	1.19482e-05
327.207	1.18837e-05
327.407	1.18196e-05
327.607	1.17559e-05
327.807	1.16925e-05
328.007	1.16294e-05
328.207	1.15667e-05
328.407	1.15043e-05
328.607	1.14423e-05
328.807	1.13806e-05
329.007	1.13192e-05
329.207	1.12582e-05
329.407	1.11975e-05
329.607	1.11372e-05
329.807	1.10771e-05
330.007	1.10174e-05
330.207	1.0958e-05
330.407	1.0899e-05
330.607	1.08403e-05
330.807	1.07819e-05
331.007	1.07238e-05
331.207	1.0666e-05
331.407	1.06085e-05
331.607	1.05514e-05
331.807	1.04946e-05
332.007	1.0438e-05
332.207	1.03818e-05
332.407	1.03259e-05
332.607	1.02703e-05
332.807	1.0215e-05
333.007	1.016e-05
333.207	1.01053e-05
333.407	1.00509e-05
333.607	9.9968e-06
333.807	9.94299e-06
334.007	9.88948e-06
334.207	9.83625e-06
334.407	9.78332e-06
334.607	9.73067e-06
334.807	9.67831e-06
335.007	9.62624e-06
335.207	9.57444e-06
335.407	9.52294e-06
335.607	9.47171e-06
335.807	9.42076e-06
336.007	9.37008e-06
336.207	9.31969e-06
336.407	9.26957e-06
336.607	9.21972e-06
336.807	9.17014e-06
337.007	9.12083e-06
337.207	9.07179e-06
337.407	9.02302e-06
337.607	8.97451e-06
337.807	8.92627e-06
338.007	8.87828e-06
338.207	8.83056e-06
338.407	8.7831e-06
338.607	8.7359e-06
338.807	8.68896e-06
339.007	8.64226e-06
339.207	8.59583e-06
339.407	8.54964e-06
339.607	8.50371e-06
339.807	8.45803e-06
340.007	8.41259e-06
340.207	8.3674e-06
340.407	8.32246e-06
340.607	8.27776e-06
340.807	8.23331e-06
341.007	8.18909e-06
341.207	8.14512e-06
341.407	8.10139e-06
341.607	8.05789e-06
341.807	8.01463e-06
342.007	7.9716e-06
342.207	7.92881e-06
342.407	7.88625e-06
342.607	7.84392e-06
342.807	7.80182e-06
343.007	7.75995e-06
343.207	7.71831e-06
343.407	7.67689e-06
343.607	7.6357e-06
343.807	7.59473e-06
344.007	7.55399e-06
344.207	7.51346e-06
344.407	7.47316e-06
344.607	7.43307e-06
344.807	7.3932e-06
345.007	7.35355e-06
345.207	7.31411e-06
345.407	7.27489e-06
345.607	7.23588e-06
345.807	7.19708e-06
346.007	7.15849e-06
346.207	7.12011e-06
346.407	7.08194e-06
346.607	7.04398e-06
346.807	7.00622e-06
347.007	6.96867e-06
347.207	6.93132e-06
347.407	6.89417e-06
347.607	6.85722e-06
347.807	6.82048e-06
348.007	6.78393e-06
348.207	6.74758e-06
348.407	6.71143e-06
348.607	6.67547e-06
348.807	6.63971e-06
349.007	6.60415e-06
349.207	6.56877e-06
349.407	6.53359e-06
349.607	6.4986e-06
349.807	6.46379e-06
350.007	6.42918e-06
350.207	6.39475e-06
350.407	6.36051e-06
350.607	6.32646e-06
350.807	6.29259e-06
351.007	6.2589e-06
351.207	6.22539e-06
351.407	6.19207e-06
351.607	6.15893e-06
351.807	6.12596e-06
352.007	6.09318e-06
352.207	6.06057e-06
352.407	6.02814e-06
352.607	5.99588e-06
352.807	5.9638e-06
353.007	5.93189e-06
353.207	5.90016e-06
353.407	5.86859e-06
353.607	5.8372e-06
353.807	5.80598e-06
354.007	5.77492e-06
354.207	5.74404e-06
354.407	5.71332e-06
354.607	5.68276e-06
354.807	5.65238e-06
355.007	5.62215e-06
355.207	5.59209e-06
355.407	5.56219e-06
355.607	5.53246e-06
355.807	5.50288e-06
356.007	5.47347e-06
356.207	5.44421e-06
356.407	5.41511e-06
356.607	5.38617e-06
356.807	5.35738e-06
357.007	5.32876e-06
357.207	5.30028e-06
357.407	5.27196e-06
357.607	5.24379e-06
357.807	5.21577e-06
358.007	5.18791e-06
358.207	5.1602e-06
358.407	5.13263e-06
358.607	5.10522e-06
358.807	5.07795e-06
359.007	5.05083e-06
359.207	5.02385e-06
359.407	4.99702e-06
359.607	4.97034e-06
359.807	4.9438e-06
360.007	4.9174e-06
360.207	4.89115e-06
360.407	4.86504e-06
360.607	4.83907e-06
360.807	4.81324e-06
361.007	4.78754e-06
361.207	4.76199e-06
361.407	4.73657e-06
361.607	4.7113e-06
361.807	4.68615e-06
362.007	4.66115e-06
362.207	4.63628e-06
362.407	4.61154e-06
362.607	4.58693e-06
362.807	4.56246e-06
363.007	4.53812e-06
363.207	4.51391e-06
363.407	4.48984e-06
363.607	4.46589e-06
363.807	4.44207e-06
364.007	4.41838e-06
364.207	4.39482e-06
364.407	4.37138e-06
364.607	4.34807e-06
364.807	4.32489e-06
365.007	4.30183e-06
365.207	4.27889e-06
365.407	4.25608e-06
365.607	4.23339e-06
365.807	4.21083e-06
366.007	4.18838e-06
366.207	4.16606e-06
366.407	4.14385e-06
366.607	4.12177e-06
366.807	4.0998e-06
367.007	4.07796e-06
367.207	4.05623e-06
367.407	4.03462e-06
367.607	4.01312e-06
367.807	3.99174e-06
368.007	3.97048e-06
368.207	3.94932e-06
368.407	3.92829e-06
368.607	3.90736e-06
368.807	3.88655e-06
369.007	3.86585e-06
369.207	3.84527e-06
369.407	3.82479e-06
369.607	3.80442e-06
369.807	3.78417e-06
370.007	3.76402e-06
370.207	3.74398e-06
370.407	3.72404e-06
370.607	3.70422e-06
370.807	3.6845e-06
371.007	3.66489e-06
371.207	3.64538e-06
371.407	3.62598e-06
371.607	3.60668e-06
371.807	3.58749e-06
372.007	3.5684e-06
372.207	3.54941e-06
372.407	3.53052e-06
372.607	3.51174e-06
372.807	3.49306e-06
373.007	3.47447e-06
373.207	3.45599e-06
373.407	3.43761e-06
373.607	3.41932e-06
373.807	3.40113e-06
374.007	3.38304e-06
374.207	3.36505e-06
374.407	3.34716e-06
374.607	3.32936e-06
374.807	3.31165e-06
375.008	3.29404e-06
375.208	3.27653e-06
375.408	3.25911e-06
375.608	3.24178e-06
375.808	3.22455e-06
376.008	3.20741e-06
376.208	3.19036e-06
376.408	3.1734e-06
376.608	3.15654e-06
376.808	3.13976e-06
377.008	3.12307e-06
377.208	3.10648e-06
377.408	3.08997e-06
377.608	3.07355e-06
377.808	3.05722e-06
378.008	3.04098e-06
378.208	3.02482e-06
378.408	3.00875e-06
378.608	2.99277e-06
378.808	2.97687e-06
379.008	2.96106e-06
379.208	2.94533e-06
379.408	2.92969e-06
379.608	2.91413e-06
379.808	2.89866e-06
380.008	2.88326e-06
380.208	2.86795e-06
380.408	2.85273e-06
380.608	2.83758e-06
380.808	2.82252e-06
381.008	2.80753e-06
381.208	2.79263e-06
381.408	2.7778e-06
381.608	2.76306e-06
381.808	2.74839e-06
382.008	2.73381e-06
382.208	2.7193e-06
382.408	2.70487e-06
382.608	2.69051e-06
382.808	2.67624e-06
383.008	2.66204e-06
383.208	2.64791e-06
383.408	2.63386e-06
383.608	2.61989e-06
383.808	2.60599e-06
384.008	2.59217e-06
384.208	2.57842e-06
384.408	2.56474e-06
384.608	2.55114e-06
384.808	2.53761e-06
385.008	2.52415e-06
385.208	2.51076e-06
385.408	2.49745e-06
385.608	2.4842e-06
385.808	2.47103e-06
386.008	2.45793e-06
386.208	2.4449e-06
386.408	2.43194e-06
386.608	2.41905e-06
386.808	2.40622e-06
387.008	2.39347e-06
387.208	2.38078e-06
387.408	2.36816e-06
387.608	2.35561e-06
387.808	2.34313e-06
388.008	2.33071e-06
388.208	2.31836e-06
388.408	2.30607e-06
388.608	2.29386e-06
388.808	2.2817e-06
389.008	2.26961e-06
389.208	2.25759e-06
389.408	2.24563e-06
389.608	2.23373e-06
389.808	2.2219e-06
390.008	2.21013e-06
390.208	2.19843e-06
390.408	2.18678e-06
390.608	2.1752e-06
390.808	2.16368e-06
391.008	2.15223e-06
391.208	2.14083e-06
391.408	2.12949e-06
391.608	2.11822e-06
391.808	2.107e-06
392.008	2.09585e-06
392.208	2.08475e-06
392.408	2.07372e-06
392.608	2.06274e-06
392.808	2.05182e-06
393.008	2.04096e-06
393.208	2.03016e-06
393.408	2.01942e-06
393.608	2.00873e-06
393.808	1.9981e-06
394.008	1.98753e-06
394.208	1.97701e-06
394.408	1.96655e-06
394.608	1.95614e-06
394.808	1.94579e-06
395.008	1.9355e-06
395.208	1.92526e-06
395.408	1.91508e-06
395.608	1.90495e-06
395.808	1.89487e-06
396.008	1.88485e-06
396.208	1.87488e-06
396.408	1.86497e-06
396.608	1.8551e-06
396.808	1.84529e-06
397.008	1.83554e-06
397.208	1.82583e-06
397.408	1.81618e-06
397.608	1.80657e-06
397.808	1.79702e-06
398.008	1.78752e-06
398.208	1.77807e-06
398.408	1.76868e-06
398.608	1.75933e-06
398.808	1.75003e-06
399.008	1.74078e-06
399.208	1.73158e-06
399.408	1.72243e-06
399.608	1.71332e-06
399.808	1.70427e-06
[truncated: 48,000 more rows]

## Sheet: 4
x (eV)	y (1/Å or input unit)	ELF
0	0	0
0	0	2.14829e-09
0	0	1.29133e-09
0	0	2.50135e-09
0	0	3.76337e-09
0	0	3.37961e-09
0	0	6.24851e-10
0	0	2.20693e-12
0	0	1.85948e-09
0	0	0
0	0	0
0	0	0
0	0	2.56105e-10
0	0	0
0	0	7.34661e-10
0	0	1.05509e-10
0	0	1.96273e-10
0	0	0
0	0	6.48347e-10
0	0	6.14729e-10
0	0	1.50429e-09
0	0	1.50805e-09
0	0	5.79538e-11
0	0	8.10562e-10
0	0	2.92565e-10
0	0	1.82858e-09
0	0	0
0	0	0
0	0	0
0	0	6.77087e-10
0	0	0
0	0	7.73419e-11
0	0	6.99819e-11
0	0	6.33222e-11
0	0	5.72963e-11
0	0	5.18439e-11
0	0	4.69103e-11
0	0	4.24462e-11
0	0	3.84069e-11
0	0	3.4752e-11
0	0	3.14449e-11
0	0	2.84525e-11
0	0	2.57449e-11
0	0	2.32949e-11
0	0	2.10781e-11
0	0	1.90723e-11
0	0	1.72573e-11
0	0	1.56151e-11
0	0	1.41291e-11
0	0	1.27845e-11
0	0	1.15679e-11
0	0	1.04671e-11
0	0	9.47102e-12
0	0	8.56973e-12
0	0	7.75421e-12
0	0	7.0163e-12
0	0	6.34861e-12
0	0	5.74446e-12
0	0	5.1978e-12
0	0	4.70317e-12
0	0	4.2556e-12
0	0	3.85063e-12
0	0	3.48419e-12
0	0	3.15263e-12
0	0	2.85262e-12
0	0	2.58115e-12
0	0	2.33552e-12
0	0	2.11327e-12
0	0	1.91217e-12
0	0	1.7302e-12
0	0	1.56555e-12
0	0	1.41657e-12
0	0	1.28176e-12
0	0	1.15979e-12
0	0	1.04942e-12
0	0	9.49553e-13
0	0	8.59191e-13
0	0	0
0.002	1.08846	0.000428558
0.002	1.08846	0.000428179
0.002	1.08846	0.000428178
0.002	1.08846	0.000428163
0.002	1.08846	0.000428139
0.002	1.08846	0.000428108
0.002	1.08846	0.000429445
0.002	1.08846	0.000428325
0.002	1.08846	0.000426396
0.002	1.08846	0.000423799
0.002	1.08846	0.000420456
0.002	1.08846	0.000409405
0.002	1.08846	0.00039501
0.002	1.08846	0.000377357
0.002	1.08846	0.000358217
0.002	1.08846	0.000337967
0.002	1.08846	0.000316389
0.002	1.08846	0.000294946
0.002	1.08846	0.000271624
0.002	1.08846	0.000251652
0.002	1.08846	0.000230371
0.002	1.08846	0.000209449
0.002	1.08846	0.000193585
0.002	1.08846	0.000171401
0.002	1.08846	0.000155622
0.002	1.08846	0.000141884
0.002	1.08846	0.000127513
0.002	1.08846	0.000110228
0.002	1.08846	9.27228e-05
0.002	1.08846	7.76236e-05
0.002	1.08846	6.86907e-05
0.002	1.08846	5.90969e-05
0.002	1.08846	5.34731e-05
0.002	1.08846	4.83845e-05
0.002	1.08846	4.37801e-05
0.002	1.08846	3.96139e-05
0.002	1.08846	3.58441e-05
0.002	1.08846	3.24331e-05
0.002	1.08846	2.93467e-05
0.002	1.08846	2.6554e-05
0.002	1.08846	2.4027e-05
0.002	1.08846	2.17405e-05
0.002	1.08846	1.96717e-05
0.002	1.08846	1.77997e-05
0.002	1.08846	1.61058e-05
0.002	1.08846	1.45731e-05
0.002	1.08846	1.31863e-05
0.002	1.08846	1.19315e-05
0.002	1.08846	1.0796e-05
0.002	1.08846	9.76866e-06
0.002	1.08846	8.83905e-06
0.002	1.08846	7.9979e-06
0.002	1.08846	7.2368e-06
0.002	1.08846	6.54813e-06
0.002	1.08846	5.92499e-06
0.002	1.08846	5.36115e-06
0.002	1.08846	4.85097e-06
0.002	1.08846	4.38934e-06
0.002	1.08846	3.97164e-06
0.002	1.08846	3.59369e-06
0.002	1.08846	3.2517e-06
0.002	1.08846	2.94226e-06
0.002	1.08846	2.66227e-06
0.002	1.08846	2.40892e-06
0.002	1.08846	2.17968e-06
0.002	1.08846	1.97226e-06
0.002	1.08846	1.78457e-06
0.002	1.08846	1.61475e-06
0.002	1.08846	1.46108e-06
0.002	1.08846	1.32204e-06
0.002	1.08846	1.19623e-06
0.002	1.08846	1.0824e-06
0.002	1.08846	9.79394e-07
0.002	1.08846	8.86192e-07
0.002	1.08846	8.0186e-07
0.002	1.08846	7.25553e-07
0.002	1.08846	6.56508e-07
0.002	1.08846	0
0.004	2.17691	0.000925239
0.004	2.17691	0.000924373
0.004	2.17691	0.000924375
0.004	2.17691	0.000924338
0.004	2.17691	0.000924283
0.004	2.17691	0.000924212
0.004	2.17691	0.000927537
0.004	2.17691	0.000924977
0.004	2.17691	0.000920544
0.004	2.17691	0.000914605
0.004	2.17691	0.00090682
0.004	2.17691	0.000881587
0.004	2.17691	0.00084866
0.004	2.17691	0.000808874
0.004	2.17691	0.000766095
0.004	2.17691	0.000720639
0.004	2.17691	0.000672979
0.004	2.17691	0.000625723
0.004	2.17691	0.000574806
0.004	2.17691	0.00053123
0.004	2.17691	0.00048521
0.004	2.17691	0.000440216
0.004	2.17691	0.000406211
0.004	2.17691	0.00035881
0.004	2.17691	0.000325123
0.004	2.17691	0.000295951
0.004	2.17691	0.000265585
0.004	2.17691	0.000229088
0.004	2.17691	0.000192327
0.004	2.17691	0.000160745
0.004	2.17691	0.000142186
0.004	2.17691	0.000122274
0.004	2.17691	0.000110638
0.004	2.17691	0.000100109
0.004	2.17691	9.05825e-05
0.004	2.17691	8.19625e-05
0.004	2.17691	7.41627e-05
0.004	2.17691	6.71052e-05
0.004	2.17691	6.07193e-05
0.004	2.17691	5.49411e-05
0.004	2.17691	4.97127e-05
0.004	2.17691	4.4982e-05
0.004	2.17691	4.07014e-05
0.004	2.17691	3.68281e-05
0.004	2.17691	3.33234e-05
0.004	2.17691	3.01523e-05
0.004	2.17691	2.72829e-05
0.004	2.17691	2.46866e-05
0.004	2.17691	2.23374e-05
0.004	2.17691	2.02117e-05
0.004	2.17691	1.82883e-05
0.004	2.17691	1.65479e-05
0.004	2.17691	1.49732e-05
0.004	2.17691	1.35483e-05
0.004	2.17691	1.2259e-05
0.004	2.17691	1.10924e-05
0.004	2.17691	1.00368e-05
0.004	2.17691	9.0817e-06
0.004	2.17691	8.21746e-06
0.004	2.17691	7.43547e-06
0.004	2.17691	6.72789e-06
0.004	2.17691	6.08764e-06
0.004	2.17691	5.50833e-06
0.004	2.17691	4.98414e-06
0.004	2.17691	4.50984e-06
0.004	2.17691	4.08067e-06
0.004	2.17691	3.69234e-06
0.004	2.17691	3.34097e-06
0.004	2.17691	3.02304e-06
0.004	2.17691	2.73536e-06
0.004	2.17691	2.47505e-06
0.004	2.17691	2.23952e-06
0.004	2.17691	2.0264e-06
0.004	2.17691	1.83356e-06
0.004	2.17691	1.65908e-06
0.004	2.17691	1.50119e-06
0.004	2.17691	1.35834e-06
0.004	2.17691	0
0.006	3.26537	0.00162117
0.006	3.26537	0.0016195
0.006	3.26537	0.00161951
0.006	3.26537	0.00161943
0.006	3.26537	0.00161932
0.006	3.26537	0.00161918
0.006	3.26537	0.00162642
0.006	3.26537	0.00162133
0.006	3.26537	0.00161246
0.006	3.26537	0.00160065
0.006	3.26537	0.00158477
0.006	3.26537	0.00153496
0.006	3.26537	0.00146999
0.006	3.26537	0.0013938
0.006	3.26537	0.00131334
0.006	3.26537	0.00122755
0.006	3.26537	0.00114043
0.006	3.26537	0.00105461
0.006	3.26537	0.000963871
0.006	3.26537	0.000886345
0.006	3.26537	0.000805826
0.006	3.26537	0.000727942
0.006	3.26537	0.000669433
0.006	3.26537	0.00058838
0.006	3.26537	0.000530836
0.006	3.26537	0.000481567
0.006	3.26537	0.000430816
0.006	3.26537	0.000369864
0.006	3.26537	0.000309195
0.006	3.26537	0.000257586
0.006	3.26537	0.000227707
0.006	3.26537	0.00019573
0.006	3.26537	0.000177104
0.006	3.26537	0.00016025
0.006	3.26537	0.000145001
0.006	3.26537	0.000131202
0.006	3.26537	0.000118716
0.006	3.26537	0.000107419
0.006	3.26537	9.71968e-05
0.006	3.26537	8.79473e-05
0.006	3.26537	7.9578e-05
0.006	3.26537	7.20052e-05
0.006	3.26537	6.5153e-05
0.006	3.26537	5.89528e-05
0.006	3.26537	5.33427e-05
0.006	3.26537	4.82665e-05
0.006	3.26537	4.36733e-05
0.006	3.26537	3.95173e-05
0.006	3.26537	3.57567e-05
0.006	3.26537	3.2354e-05
0.006	3.26537	2.92751e-05
0.006	3.26537	2.64892e-05
0.006	3.26537	2.39684e-05
0.006	3.26537	2.16875e-05
0.006	3.26537	1.96237e-05
0.006	3.26537	1.77563e-05
0.006	3.26537	1.60665e-05
0.006	3.26537	1.45376e-05
0.006	3.26537	1.31542e-05
0.006	3.26537	1.19024e-05
0.006	3.26537	1.07697e-05
0.006	3.26537	9.74484e-06
0.006	3.26537	8.81749e-06
0.006	3.26537	7.9784e-06
0.006	3.26537	7.21915e-06
0.006	3.26537	6.53216e-06
0.006	3.26537	5.91054e-06
0.006	3.26537	5.34808e-06
0.006	3.26537	4.83914e-06
0.006	3.26537	4.37864e-06
0.006	3.26537	3.96196e-06
0.006	3.26537	3.58493e-06
0.006	3.26537	3.24378e-06
0.006	3.26537	2.93509e-06
0.006	3.26537	2.65578e-06
0.006	3.26537	2.40305e-06
0.006	3.26537	2.17437e-06
0.006	3.26537	0
0.008	4.35382	0.0030788
0.008	4.35382	0.00307495
0.008	4.35382	0.00307501
0.008	4.35382	0.00307483
0.008	4.35382	0.00307457
0.008	4.35382	0.00307426
0.008	4.35382	0.00309267
0.008	4.35382	0.00307984
0.008	4.35382	0.00305751
0.008	4.35382	0.00302797
0.008	4.35382	0.00298746
0.008	4.35382	0.00286639
0.008	4.35382	0.0027107
0.008	4.35382	0.0025392
0.008	4.35382	0.00236586
0.008	4.35382	0.00218143
0.008	4.35382	0.00200747
0.008	4.35382	0.00183794
0.008	4.35382	0.00166608
0.008	4.35382	0.00151896
0.008	4.35382	0.00136875
0.008	4.35382	0.0012246
0.008	4.35382	0.00111664
0.008	4.35382	0.000967526
0.008	4.35382	0.000860577
0.008	4.35382	0.000771923
0.008	4.35382	0.000683562
0.008	4.35382	0.000575788
0.008	4.35382	0.000472933
0.008	4.35382	0.000390902
0.008	4.35382	0.000346555
0.008	4.35382	0.000299697
0.008	4.35382	0.000271177
0.008	4.35382	0.000245371
0.008	4.35382	0.000222021
0.008	4.35382	0.000200893
0.008	4.35382	0.000181775
0.008	4.35382	0.000164477
0.008	4.35382	0.000148825
0.008	4.35382	0.000134662
0.008	4.35382	0.000121848
0.008	4.35382	0.000110252
0.008	4.35382	9.97603e-05
0.008	4.35382	9.02669e-05
0.008	4.35382	8.16768e-05
0.008	4.35382	7.39043e-05
0.008	4.35382	6.68713e-05
0.008	4.35382	6.05077e-05
0.008	4.35382	5.47496e-05
0.008	4.35382	4.95395e-05
0.008	4.35382	4.48252e-05
0.008	4.35382	4.05595e-05
0.008	4.35382	3.66998e-05
0.008	4.35382	3.32073e-05
0.008	4.35382	3.00472e-05
0.008	4.35382	2.71879e-05
0.008	4.35382	2.46006e-05
0.008	4.35382	2.22595e-05
0.008	4.35382	2.01413e-05
0.008	4.35382	1.82246e-05
0.008	4.35382	1.64903e-05
0.008	4.35382	1.4921e-05
0.008	4.35382	1.35011e-05
0.008	4.35382	1.22163e-05
0.008	4.35382	1.10538e-05
0.008	4.35382	1.00019e-05
0.008	4.35382	9.05005e-06
0.008	4.35382	8.18882e-06
0.008	4.35382	7.40956e-06
0.008	4.35382	6.70444e-06
0.008	4.35382	6.06643e-06
0.008	4.35382	5.48913e-06
0.008	4.35382	4.96677e-06
0.008	4.35382	4.49412e-06
0.008	4.35382	4.06645e-06
0.008	4.35382	3.67948e-06
0.008	4.35382	3.32933e-06
0.008	4.35382	0
0.01	5.44228	0.0216081
0.01	5.44228	0.0215768
0.01	5.44228	0.021579
0.01	5.44228	0.021574
0.01	5.44228	0.0215722
0.01	5.44228	0.0215688
0.01	5.44228	0.0217332
0.01	5.44228	0.0214797
0.01	5.44228	0.0210914
0.01	5.44228	0.0205655
0.01	5.44228	0.0198278
0.01	5.44228	0.0177168
0.01	5.44228	0.0152287
0.01	5.44228	0.0129375
0.01	5.44228	0.0110418
0.01	5.44228	0.00942077
0.01	5.44228	0.00822786
0.01	5.44228	0.0072406
0.01	5.44228	0.00633749
0.01	5.44228	0.00555489
0.01	5.44228	0.00481352
0.01	5.44228	0.00414311
0.01	5.44228	0.00364075
0.01	5.44228	0.00300144
0.01	5.44228	0.00252285
0.01	5.44228	0.00215704
0.01	5.44228	0.00182608
0.01	5.44228	0.00141657
0.01	5.44228	0.00109921
0.01	5.44228	0.000878519
0.01	5.44228	0.000790596
0.01	5.44228	0.000702148
0.01	5.44228	0.00063533
0.01	5.44228	0.00057487
0.01	5.44228	0.000520164
0.01	5.44228	0.000470664
0.01	5.44228	0.000425874
0.01	5.44228	0.000385347
0.01	5.44228	0.000348676
0.01	5.44228	0.000315495
0.01	5.44228	0.000285472
0.01	5.44228	0.000258306
0.01	5.44228	0.000233725
0.01	5.44228	0.000211483
0.01	5.44228	0.000191358
0.01	5.44228	0.000173148
0.01	5.44228	0.00015667
0.01	5.44228	0.000141761
0.01	5.44228	0.000128271
0.01	5.44228	0.000116064
0.01	5.44228	0.000105019
0.01	5.44228	9.50254e-05
0.01	5.44228	8.59825e-05
0.01	5.44228	7.78002e-05
0.01	5.44228	7.03965e-05
0.01	5.44228	6.36974e-05
0.01	5.44228	5.76358e-05
0.01	5.44228	5.2151e-05
0.01	5.44228	4.71882e-05
0.01	5.44228	4.26977e-05
0.01	5.44228	3.86344e-05
0.01	5.44228	3.49579e-05
0.01	5.44228	3.16312e-05
0.01	5.44228	2.86211e-05
0.01	5.44228	2.58974e-05
0.01	5.44228	2.3433e-05
0.01	5.44228	2.1203e-05
0.01	5.44228	1.91853e-05
0.01	5.44228	1.73596e-05
0.01	5.44228	1.57076e-05
0.01	5.44228	1.42128e-05
0.01	5.44228	1.28603e-05
0.01	5.44228	1.16365e-05
0.01	5.44228	1.05291e-05
0.01	5.44228	9.52714e-06
0.01	5.44228	8.62051e-06
0.01	5.44228	7.80016e-06
0.01	5.44228	0
0.02	6.53073	0.0711524
0.02	6.53073	0.0710055
0.02	6.53073	0.0709839
0.02	6.53073	0.0709748
0.02	6.53073	0.0709634
0.02	6.53073	0.070957
0.02	6.53073	0.0718499
0.02	6.53073	0.0717856
0.02	6.53073	0.0709995
0.02	6.53073	0.0705775
0.02	6.53073	0.0694575
0.02	6.53073	0.0663596
0.02	6.53073	0.0614823
0.02	6.53073	0.0553307
0.02	6.53073	0.0482365
0.02	6.53073	0.0407055
0.02	6.53073	0.034479
0.02	6.53073	0.0291473
0.02	6.53073	0.0244985
0.02	6.53073	0.0208096
0.02	6.53073	0.0175372
0.02	6.53073	0.014716
0.02	6.53073	0.0127841
0.02	6.53073	0.0102731
0.02	6.53073	0.00858532
0.02	6.53073	0.0073455
0.02	6.53073	0.00624328
0.02	6.53073	0.00501693
0.02	6.53073	0.00394036
0.02	6.53073	0.00308277
0.02	6.53073	0.00269752
0.02	6.53073	0.00230906
0.02	6.53073	0.00208932
0.02	6.53073	0.0018905
0.02	6.53073	0.00171059
0.02	6.53073	0.00154781
0.02	6.53073	0.00140052
0.02	6.53073	0.00126724
0.02	6.53073	0.00114665
0.02	6.53073	0.00103753
0.02	6.53073	0.000938794
0.02	6.53073	0.000849456
0.02	6.53073	0.00076862
0.02	6.53073	0.000695476
0.02	6.53073	0.000629293
0.02	6.53073	0.000569407
0.02	6.53073	0.000515221
0.02	6.53073	0.000466191
0.02	6.53073	0.000421827
0.02	6.53073	0.000381685
0.02	6.53073	0.000345363
0.02	6.53073	0.000312497
0.02	6.53073	0.000282759
0.02	6.53073	0.000255851
0.02	6.53073	0.000231504
0.02	6.53073	0.000209473
0.02	6.53073	0.000189539
0.02	6.53073	0.000171502
0.02	6.53073	0.000155182
0.02	6.53073	0.000140414
0.02	6.53073	0.000127052
0.02	6.53073	0.000114961
0.02	6.53073	0.000104021
0.02	6.53073	9.41224e-05
0.02	6.53073	8.51655e-05
0.02	6.53073	7.70609e-05
0.02	6.53073	6.97276e-05
0.02	6.53073	6.30921e-05
0.02	6.53073	5.70881e-05
0.02	6.53073	5.16555e-05
0.02	6.53073	4.67398e-05
0.02	6.53073	4.22919e-05
0.02	6.53073	3.82673e-05
0.02	6.53073	3.46257e-05
0.02	6.53073	3.13306e-05
0.02	6.53073	2.83491e-05
0.02	6.53073	2.56514e-05
0.02	6.53073	0
0.04	7.61919	0.108518
0.04	7.61919	0.108322
0.04	7.61919	0.10832
0.04	7.61919	0.108313
0.04	7.61919	0.108304
0.04	7.61919	0.108293
0.04	7.61919	0.109551
0.04	7.61919	0.109228
0.04	7.61919	0.108524
0.04	7.61919	0.10769
0.04	7.61919	0.106314
0.04	7.61919	0.10278
0.04	7.61919	0.0973546
0.04	7.61919	0.0910579
0.04	7.61919	0.084417
0.04	7.61919	0.0761751
0.04	7.61919	0.0680007
0.04	7.61919	0.0589479
0.04	7.61919	0.0497259
0.04	7.61919	0.0419433
0.04	7.61919	0.0350907
0.04	7.61919	0.0294267
0.04	7.61919	0.025492
0.04	7.61919	0.020896
0.04	7.61919	0.0177393
0.04	7.61919	0.0153197
0.04	7.61919	0.0130797
0.04	7.61919	0.0105652
0.04	7.61919	0.00823029
0.04	7.61919	0.00638615
0.04	7.61919	0.00550599
0.04	7.61919	0.00462198
0.04	7.61919	0.00418214
0.04	7.61919	0.00378415
0.04	7.61919	0.00342404
0.04	7.61919	0.0030982
0.04	7.61919	0.00280337
0.04	7.61919	0.00253659
0.04	7.61919	0.00229521
0.04	7.61919	0.00207679
0.04	7.61919	0.00187916
0.04	7.61919	0.00170033
0.04	7.61919	0.00153852
0.04	7.61919	0.00139211
0.04	7.61919	0.00125964
0.04	7.61919	0.00113977
0.04	7.61919	0.0010313
0.04	7.61919	0.000933161
0.04	7.61919	0.000844359
0.04	7.61919	0.000764007
0.04	7.61919	0.000691303
0.04	7.61919	0.000625516
0.04	7.61919	0.000565991
0.04	7.61919	0.00051213
0.04	7.61919	0.000463394
0.04	7.61919	0.000419296
0.04	7.61919	0.000379395
0.04	7.61919	0.000343291
0.04	7.61919	0.000310622
0.04	7.61919	0.000281063
0.04	7.61919	0.000254316
0.04	7.61919	0.000230115
0.04	7.61919	0.000208216
0.04	7.61919	0.000188402
0.04	7.61919	0.000170473
0.04	7.61919	0.00015425
0.04	7.61919	0.000139572
0.04	7.61919	0.00012629
0.04	7.61919	0.000114272
0.04	7.61919	0.000103397
0.04	7.61919	9.35576e-05
0.04	7.61919	8.46544e-05
0.04	7.61919	7.65985e-05
0.04	7.61919	6.93092e-05
0.04	7.61919	6.27136e-05
0.04	7.61919	5.67456e-05
0.04	7.61919	5.13455e-05
0.04	7.61919	0
0.06	8.70764	0.14861
0.06	8.70764	0.14839
0.06	8.70764	0.14841
0.06	8.70764	0.148418
0.06	8.70764	0.148432
0.06	8.70764	0.148429
0.06	8.70764	0.150278
0.06	8.70764	0.149921
0.06	8.70764	0.1493
0.06	8.70764	0.14862
0.06	8.70764	0.147306
0.06	8.70764	0.143792
0.06	8.70764	0.138054
0.06	8.70764	0.131762
0.06	8.70764	0.125102
0.06	8.70764	0.115097
0.06	8.70764	0.104658
0.06	8.70764	0.0929697
0.06	8.70764	0.0812019
0.06	8.70764	0.0710168
0.06	8.70764	0.0612955
0.06	8.70764	0.0523278
0.06	8.70764	0.0458054
0.06	8.70764	0.0373913
0.06	8.70764	0.0316732
0.06	8.70764	0.0273913
0.06	8.70764	0.0234156
0.06	8.70764	0.0187503
0.06	8.70764	0.0145138
0.06	8.70764	0.0114033
0.06	8.70764	0.00996079
0.06	8.70764	0.00839696
0.06	8.70764	0.00759788
0.06	8.70764	0.00687485
0.06	8.70764	0.00622062
0.06	8.70764	0.00562865
0.06	8.70764	0.00509301
0.06	8.70764	0.00460835
0.06	8.70764	0.0041698
0.06	8.70764	0.003773
0.06	8.70764	0.00341395
0.06	8.70764	0.00308907
0.06	8.70764	0.0027951
0.06	8.70764	0.00252911
0.06	8.70764	0.00228844
0.06	8.70764	0.00207066
0.06	8.70764	0.00187361
0.06	8.70764	0.00169532
0.06	8.70764	0.00153399
0.06	8.70764	0.00138801
0.06	8.70764	0.00125592
0.06	8.70764	0.0011364
0.06	8.70764	0.00102826
0.06	8.70764	0.000930409
0.06	8.70764	0.000841869
0.06	8.70764	0.000761755
0.06	8.70764	0.000689264
0.06	8.70764	0.000623672
0.06	8.70764	0.000564322
0.06	8.70764	0.000510619
0.06	8.70764	0.000462028
0.06	8.70764	0.00041806
0.06	8.70764	0.000378276
0.06	8.70764	0.000342278
0.06	8.70764	0.000309706
0.06	8.70764	0.000280234
0.06	8.70764	0.000253566
0.06	8.70764	0.000229436
0.06	8.70764	0.000207602
0.06	8.70764	0.000187846
0.06	8.70764	0.00016997
0.06	8.70764	0.000153796
0.06	8.70764	0.00013916
0.06	8.70764	0.000125917
0.06	8.70764	0.000113935
0.06	8.70764	0.000103092
0.06	8.70764	9.32818e-05
0.06	8.70764	0
0.08	9.7961	0.172557
0.08	9.7961	0.172352
0.08	9.7961	0.172386
0.08	9.7961	0.172432
0.08	9.7961	0.172453
0.08	9.7961	0.172472
0.08	9.7961	0.174804
0.08	9.7961	0.174235
0.08	9.7961	0.17376
0.08	9.7961	0.173027
0.08	9.7961	0.171619
0.08	9.7961	0.168024
0.08	9.7961	0.162303
0.08	9.7961	0.155565
0.08	9.7961	0.148182
0.08	9.7961	0.137938
0.08	9.7961	0.128013
0.08	9.7961	0.117167
0.08	9.7961	0.105301
0.08	9.7961	0.0943117
0.08	9.7961	0.0832771
0.08	9.7961	0.0730284
0.08	9.7961	0.0655445
0.08	9.7961	0.0557079
0.08	9.7961	0.0485922
0.08	9.7961	0.042849
0.08	9.7961	0.0371514
0.08	9.7961	0.0305826
0.08	9.7961	0.0245258
0.08	9.7961	0.0195549
0.08	9.7961	0.0169897
0.08	9.7961	0.0141436
0.08	9.7961	0.0127977
0.08	9.7961	0.0115798
0.08	9.7961	0.0104779
0.08	9.7961	0.00948076
0.08	9.7961	0.00857854
0.08	9.7961	0.00776219
0.08	9.7961	0.00702352
0.08	9.7961	0.00635514
0.08	9.7961	0.00575037
0.08	9.7961	0.00520315
0.08	9.7961	0.004708
0.08	9.7961	0.00425998
0.08	9.7961	0.00385459
0.08	9.7961	0.00348778
0.08	9.7961	0.00315587
0.08	9.7961	0.00285555
0.08	9.7961	0.00258381
0.08	9.7961	0.00233793
0.08	9.7961	0.00211544
0.08	9.7961	0.00191413
0.08	9.7961	0.00173198
0.08	9.7961	0.00156716
0.08	9.7961	0.00141802
0.08	9.7961	0.00128308
0.08	9.7961	0.00116098
0.08	9.7961	0.0010505
0.08	9.7961	0.00095053
0.08	9.7961	0.000860075
0.08	9.7961	0.000778228
0.08	9.7961	0.00070417
0.08	9.7961	0.000637159
0.08	9.7961	0.000576525
0.08	9.7961	0.000521662
0.08	9.7961	0.000472019
0.08	9.7961	0.000427101
0.08	9.7961	0.000386457
0.08	9.7961	0.00034968
0.08	9.7961	0.000316404
0.08	9.7961	0.000286294
0.08	9.7961	0.00025905
0.08	9.7961	0.000234398
0.08	9.7961	0.000212092
0.08	9.7961	0.000191909
0.08	9.7961	0.000173646
0.08	9.7961	0.000157122
0.08	9.7961	0
0.1	10.8846	0.203307
0.1	10.8846	0.203022
0.1	10.8846	0.203003
0.1	10.8846	0.202995
0.1	10.8846	0.20298
0.1	10.8846	0.202961
0.1	10.8846	0.205437
0.1	10.8846	0.205215
0.1	10.8846	0.204519
0.1	10.8846	0.203691
0.1	10.8846	0.202114
0.1	10.8846	0.197612
0.1	10.8846	0.191075
0.1	10.8846	0.183999
0.1	10.8846	0.176792
0.1	10.8846	0.166597
0.1	10.8846	0.157392
0.1	10.8846	0.146878
0.1	10.8846	0.135356
0.1	10.8846	0.123923
0.1	10.8846	0.112304
0.1	10.8846	0.100698
0.1	10.8846	0.09192
0.1	10.8846	0.0793084
0.1	10.8846	0.0699823
0.1	10.8846	0.0617581
0.1	10.8846	0.0536964
0.1	10.8846	0.0440274
0.1	10.8846	0.0358726
0.1	10.8846	0.0287827
0.1	10.8846	0.0248921
0.1	10.8846	0.0206016
0.1	10.8846	0.0186411
0.1	10.8846	0.0168672
0.1	10.8846	0.0152621
0.1	10.8846	0.0138097
0.1	10.8846	0.0124955
0.1	10.8846	0.0113064
0.1	10.8846	0.0102305
0.1	10.8846	0.00925691
0.1	10.8846	0.008376
0.1	10.8846	0.00757892
0.1	10.8846	0.00685769
0.1	10.8846	0.0062051
0.1	10.8846	0.0056146
0.1	10.8846	0.0050803
0.1	10.8846	0.00459685
0.1	10.8846	0.0041594
0.1	10.8846	0.00376358
0.1	10.8846	0.00340543
0.1	10.8846	0.00308136
0.1	10.8846	0.00278813
0.1	10.8846	0.0025228
0.1	10.8846	0.00228273
0.1	10.8846	0.0020655
0.1	10.8846	0.00186894
0.1	10.8846	0.00169109
0.1	10.8846	0.00153016
0.1	10.8846	0.00138454
0.1	10.8846	0.00125279
0.1	10.8846	0.00113357
0.1	10.8846	0.0010257
0.1	10.8846	0.000928088
0.1	10.8846	0.000839768
0.1	10.8846	0.000759854
0.1	10.8846	0.000687544
0.1	10.8846	0.000622116
0.1	10.8846	0.000562914
0.1	10.8846	0.000509345
0.1	10.8846	0.000460875
0.1	10.8846	0.000417017
0.1	10.8846	0.000377332
0.1	10.8846	0.000341424
0.1	10.8846	0.000308934
0.1	10.8846	0.000279535
0.1	10.8846	0.000252933
0.1	10.8846	0.000228864
0.1	10.8846	0
0.15	11.973	0.226919
0.15	11.973	0.226614
0.15	11.973	0.226602
0.15	11.973	0.226605
0.15	11.973	0.226593
0.15	11.973	0.226588
0.15	11.973	0.229082
0.15	11.973	0.228956
0.15	11.973	0.228397
0.15	11.973	0.227885
0.15	11.973	0.226615
0.15	11.973	0.223739
0.15	11.973	0.219283
0.15	11.973	0.213745
0.15	11.973	0.207813
0.15	11.973	0.198575
0.15	11.973	0.189145
0.15	11.973	0.177678
0.15	11.973	0.164623
0.15	11.973	0.152255
0.15	11.973	0.139521
0.15	11.973	0.126424
0.15	11.973	0.115901
0.15	11.973	0.100511
0.15	11.973	0.089265
0.15	11.973	0.0792572
0.15	11.973	0.0696795
0.15	11.973	0.0571475
0.15	11.973	0.0464147
0.15	11.973	0.0377859
0.15	11.973	0.0332756
0.15	11.973	0.0281161
0.15	11.973	0.0254405
0.15	11.973	0.0230195
0.15	11.973	0.0208289
0.15	11.973	0.0188468
0.15	11.973	0.0170533
0.15	11.973	0.0154304
0.15	11.973	0.013962
0.15	11.973	0.0126334
0.15	11.973	0.0114311
0.15	11.973	0.0103433
0.15	11.973	0.00935903
0.15	11.973	0.0084684
0.15	11.973	0.00766253
0.15	11.973	0.00693334
0.15	11.973	0.00627355
0.15	11.973	0.00567654
0.15	11.973	0.00513635
0.15	11.973	0.00464756
0.15	11.973	0.00420528
0.15	11.973	0.0038051
0.15	11.973	0.003443
0.15	11.973	0.00311535
0.15	11.973	0.00281889
0.15	11.973	0.00255063
0.15	11.973	0.00230791
0.15	11.973	0.00208828
0.15	11.973	0.00188956
0.15	11.973	0.00170974
0.15	11.973	0.00154704
0.15	11.973	0.00139982
0.15	11.973	0.00126661
0.15	11.973	0.00114607
0.15	11.973	0.00103701
0.15	11.973	0.000938326
0.15	11.973	0.000849032
0.15	11.973	0.000768236
0.15	11.973	0.000695129
0.15	11.973	0.000628979
0.15	11.973	0.000569123
0.15	11.973	0.000514964
0.15	11.973	0.000465959
0.15	11.973	0.000421617
0.15	11.973	0.000381495
0.15	11.973	0.000345191
0.15	11.973	0.000312342
0.15	11.973	0
0.2	13.0615	0.277239
0.2	13.0615	0.276839
0.2	13.0615	0.276825
0.2	13.0615	0.276801
0.2	13.0615	0.276775
0.2	13.0615	0.276756
0.2	13.0615	0.279576
0.2	13.0615	0.279512
0.2	13.0615	0.278452
0.2	13.0615	0.277572
0.2	13.0615	0.274744
0.2	13.0615	0.270589
0.2	13.0615	0.265473
0.2	13.0615	0.2578
0.2	13.0615	0.250046
0.2	13.0615	0.240247
0.2	13.0615	0.229957
0.2	13.0615	0.216657
0.2	13.0615	0.202538
0.2	13.0615	0.188572
0.2	13.0615	0.174339
0.2	13.0615	0.159969
0.2	13.0615	0.148517
0.2	13.0615	0.132046
0.2	13.0615	0.11906
0.2	13.0615	0.106975
0.2	13.0615	0.094198
0.2	13.0615	0.0781139
0.2	13.0615	0.0634178
0.2	13.0615	0.0512573
0.2	13.0615	0.0449339
0.2	13.0615	0.0383037
0.2	13.0615	0.0346586
0.2	13.0615	0.0313604
0.2	13.0615	0.028376
0.2	13.0615	0.0256757
0.2	13.0615	0.0232323
0.2	13.0615	0.0210215
0.2	13.0615	0.019021
0.2	13.0615	0.0172109
0.2	13.0615	0.0155731
0.2	13.0615	0.0140911
0.2	13.0615	0.0127502
0.2	13.0615	0.0115368
0.2	13.0615	0.010439
0.2	13.0615	0.00944556
0.2	13.0615	0.0085467
0.2	13.0615	0.00773337
0.2	13.0615	0.00699745
0.2	13.0615	0.00633155
0.2	13.0615	0.00572902
0.2	13.0615	0.00518384
0.2	13.0615	0.00469053
0.2	13.0615	0.00424417
0.2	13.0615	0.00384028
0.2	13.0615	0.00347483
0.2	13.0615	0.00314416
0.2	13.0615	0.00284495
0.2	13.0615	0.00257422
0.2	13.0615	0.00232925
0.2	13.0615	0.00210759
0.2	13.0615	0.00190703
0.2	13.0615	0.00172555
0.2	13.0615	0.00156134
0.2	13.0615	0.00141276
0.2	13.0615	0.00127832
0.2	13.0615	0.00115667
0.2	13.0615	0.0010466
0.2	13.0615	0.000947001
0.2	13.0615	0.000856882
0.2	13.0615	0.000775339
0.2	13.0615	0.000701556
0.2	13.0615	0.000634794
0.2	13.0615	0.000574385
0.2	13.0615	0.000519725
0.2	13.0615	0.000470267
0.2	13.0615	0.000425515
0.2	13.0615	0
0.25	14.1499	0.337983
0.25	14.1499	0.337562
0.25	14.1499	0.337516
0.25	14.1499	0.3375
0.25	14.1499	0.337474
0.25	14.1499	0.337459
0.25	14.1499	0.339758
0.25	14.1499	0.339657
0.25	14.1499	0.33922
0.25	14.1499	0.338634
0.25	14.1499	0.336414
0.25	14.1499	0.33363
0.25	14.1499	0.329698
0.25	14.1499	0.323152
0.25	14.1499	0.315759
0.25	14.1499	0.307598
0.25	14.1499	0.296879
0.25	14.1499	0.282489
0.25	14.1499	0.265411
0.25	14.1499	0.248684
0.25	14.1499	0.228733
0.25	14.1499	0.207564
0.25	14.1499	0.190603
0.25	14.1499	0.166958
0.25	14.1499	0.15016
0.25	14.1499	0.135195
0.25	14.1499	0.119578
0.25	14.1499	0.100383
0.25	14.1499	0.0820785
0.25	14.1499	0.0660141
0.25	14.1499	0.0564058
0.25	14.1499	0.0472957
0.25	14.1499	0.0427949
0.25	14.1499	0.0387224
0.25	14.1499	0.0350375
0.25	14.1499	0.0317033
0.25	14.1499	0.0286863
0.25	14.1499	0.0259564
0.25	14.1499	0.0234864
0.25	14.1499	0.0212513
0.25	14.1499	0.019229
0.25	14.1499	0.0173991
0.25	14.1499	0.0157434
0.25	14.1499	0.0142452
0.25	14.1499	0.0128896
0.25	14.1499	0.011663
0.25	14.1499	0.0105531
0.25	14.1499	0.00954884
0.25	14.1499	0.00864015
0.25	14.1499	0.00781793
0.25	14.1499	0.00707395
0.25	14.1499	0.00640078
0.25	14.1499	0.00579166
0.25	14.1499	0.00524051
0.25	14.1499	0.00474181
0.25	14.1499	0.00429057
0.25	14.1499	0.00388227
0.25	14.1499	0.00351282
0.25	14.1499	0.00317853
0.25	14.1499	0.00287605
0.25	14.1499	0.00260236
0.25	14.1499	0.00235471
0.25	14.1499	0.00213063
0.25	14.1499	0.00192788
0.25	14.1499	0.00174442
0.25	14.1499	0.00157841
0.25	14.1499	0.00142821
0.25	14.1499	0.00129229
0.25	14.1499	0.00116932
0.25	14.1499	0.00105804
0.25	14.1499	0.000957355
0.25	14.1499	0.000866251
0.25	14.1499	0.000783816
0.25	14.1499	0.000709226
0.25	14.1499	0.000641735
0.25	14.1499	0.000580665
0.25	14.1499	0.000525408
0.25	14.1499	0
0.3	15.2384	0.401866
0.3	15.2384	0.401416
0.3	15.2384	0.401408
0.3	15.2384	0.401379
0.3	15.2384	0.401355
0.3	15.2384	0.401329
0.3	15.2384	0.406826
0.3	15.2384	0.406579
0.3	15.2384	0.405713
0.3	15.2384	0.404967
0.3	15.2384	0.403619
0.3	15.2384	0.400166
0.3	15.2384	0.39633
0.3	15.2384	0.386848
0.3	15.2384	0.377265
0.3	15.2384	0.364949
0.3	15.2384	0.348664
0.3	15.2384	0.329905
0.3	15.2384	0.308007
0.3	15.2384	0.289758
0.3	15.2384	0.267205
0.3	15.2384	0.244715
0.3	15.2384	0.227212
0.3	15.2384	0.201213
0.3	15.2384	0.182015
0.3	15.2384	0.165176
0.3	15.2384	0.146957
0.3	15.2384	0.125973
0.3	15.2384	0.103947
0.3	15.2384	0.0839736
0.3	15.2384	0.0718337
0.3	15.2384	0.0599733
0.3	15.2384	0.0542661
0.3	15.2384	0.049102
0.3	15.2384	0.0444293
0.3	15.2384	0.0402013
0.3	15.2384	0.0363757
0.3	15.2384	0.0329141
0.3	15.2384	0.0297819
0.3	15.2384	0.0269477
0.3	15.2384	0.0243833
0.3	15.2384	0.0220629
0.3	15.2384	0.0199634
0.3	15.2384	0.0180636
0.3	15.2384	0.0163446
0.3	15.2384	0.0147892
0.3	15.2384	0.0133819
0.3	15.2384	0.0121084
0.3	15.2384	0.0109561
0.3	15.2384	0.00991352
0.3	15.2384	0.00897013
0.3	15.2384	0.00811651
0.3	15.2384	0.00734412
0.3	15.2384	0.00664523
0.3	15.2384	0.00601285
0.3	15.2384	0.00544066
0.3	15.2384	0.00492291
0.3	15.2384	0.00445443
0.3	15.2384	0.00403054
0.3	15.2384	0.00364698
0.3	15.2384	0.00329992
0.3	15.2384	0.0029859
0.3	15.2384	0.00270175
0.3	15.2384	0.00244464
0.3	15.2384	0.00221201
0.3	15.2384	0.00200151
0.3	15.2384	0.00181104
0.3	15.2384	0.00163869
0.3	15.2384	0.00148275
0.3	15.2384	0.00134165
0.3	15.2384	0.00121397
0.3	15.2384	0.00109845
0.3	15.2384	0.000993918
0.3	15.2384	0.000899334
0.3	15.2384	0.000813751
0.3	15.2384	0.000736313
0.3	15.2384	0.000666243
0.3	15.2384	0
0.35	16.3268	0.463255
0.35	16.3268	0.462763
0.35	16.3268	0.462758
0.35	16.3268	0.462733
0.35	16.3268	0.462705
0.35	16.3268	0.462686
0.35	16.3268	0.467132
0.35	16.3268	0.466945
0.35	16.3268	0.46743
0.35	16.3268	0.466494
0.35	16.3268	0.465967
0.35	16.3268	0.461485
0.35	16.3268	0.458601
0.35	16.3268	0.449412
0.35	16.3268	0.442029
0.35	16.3268	0.430772
0.35	16.3268	0.414299
0.35	16.3268	0.39746
0.35	16.3268	0.37548
0.35	16.3268	0.355534
0.35	16.3268	0.331285
0.35	16.3268	0.304127
0.35	16.3268	0.283414
0.35	16.3268	0.251672
0.35	16.3268	0.228312
0.35	16.3268	0.207953
0.35	16.3268	0.184505
0.35	16.3268	0.158261
0.35	16.3268	0.13064
0.35	16.3268	0.103769
0.35	16.3268	0.0871021
0.35	16.3268	0.0710222
0.35	16.3268	0.0642635
0.35	16.3268	0.0581481
0.35	16.3268	0.0526145
0.35	16.3268	0.0476076
0.35	16.3268	0.0430771
0.35	16.3268	0.0389778
0.35	16.3268	0.0352686
0.35	16.3268	0.0319123
0.35	16.3268	0.0288755
0.35	16.3268	0.0261276
0.35	16.3268	0.0236412
0.35	16.3268	0.0213915
0.35	16.3268	0.0193558
0.35	16.3268	0.0175139
0.35	16.3268	0.0158472
0.35	16.3268	0.0143391
0.35	16.3268	0.0129746
0.35	16.3268	0.0117399
0.35	16.3268	0.0106227
0.35	16.3268	0.00961181
0.35	16.3268	0.00869712
0.35	16.3268	0.00786948
0.35	16.3268	0.0071206
0.35	16.3268	0.00644299
0.35	16.3268	0.00582986
0.35	16.3268	0.00527507
0.35	16.3268	0.00477308
0.35	16.3268	0.00431886
0.35	16.3268	0.00390787
0.35	16.3268	0.00353599
0.35	16.3268	0.00319949
0.35	16.3268	0.00289502
0.35	16.3268	0.00261952
0.35	16.3268	0.00237024
0.35	16.3268	0.00214468
0.35	16.3268	0.00194059
0.35	16.3268	0.00175592
0.35	16.3268	0.00158882
0.35	16.3268	0.00143762
0.35	16.3268	0.00130082
0.35	16.3268	0.00117703
0.35	16.3268	0.00106502
0.35	16.3268	0.000963669
0.35	16.3268	0.000871964
0.35	16.3268	0.000788985
0.35	16.3268	0
0.4	17.4153	0.566031
0.4	17.4153	0.565531
0.4	17.4153	0.565543
0.4	17.4153	0.565538
0.4	17.4153	0.565515
0.4	17.4153	0.565485
0.4	17.4153	0.564642
0.4	17.4153	0.56336
0.4	17.4153	0.562489
0.4	17.4153	0.55981
0.4	17.4153	0.557022
0.4	17.4153	0.547385
0.4	17.4153	0.537996
0.4	17.4153	0.522846
0.4	17.4153	0.510357
0.4	17.4153	0.496862
0.4	17.4153	0.475986
0.4	17.4153	0.456006
0.4	17.4153	0.431027
0.4	17.4153	0.408385
0.4	17.4153	0.380644
0.4	17.4153	0.350223
0.4	17.4153	0.327259
0.4	17.4153	0.291966
0.4	17.4153	0.265818
0.4	17.4153	0.241399
0.4	17.4153	0.214643
0.4	17.4153	0.186256
0.4	17.4153	0.153216
0.4	17.4153	0.121852
0.4	17.4153	0.103804
0.4	17.4153	0.0839878
0.4	17.4153	0.0759953
0.4	17.4153	0.0687634
0.4	17.4153	0.0622197
0.4	17.4153	0.0562987
0.4	17.4153	0.0509412
0.4	17.4153	0.0460935
0.4	17.4153	0.0417071
0.4	17.4153	0.0377382
0.4	17.4153	0.0341469
0.4	17.4153	0.0308974
0.4	17.4153	0.0279571
0.4	17.4153	0.0252966
0.4	17.4153	0.0228894
0.4	17.4153	0.0207111
0.4	17.4153	0.0187402
0.4	17.4153	0.0169569
0.4	17.4153	0.0153432
0.4	17.4153	0.0138831
0.4	17.4153	0.0125619
0.4	17.4153	0.0113665
0.4	17.4153	0.0102848
0.4	17.4153	0.00930612
0.4	17.4153	0.00842052
0.4	17.4153	0.0076192
0.4	17.4153	0.00689414
0.4	17.4153	0.00623808
0.4	17.4153	0.00564445
0.4	17.4153	0.00510731
0.4	17.4153	0.00462128
0.4	17.4153	0.00418151
0.4	17.4153	0.00378358
0.4	17.4153	0.00342353
0.4	17.4153	0.00309774
0.4	17.4153	0.00280295
0.4	17.4153	0.00253621
0.4	17.4153	0.00229486
0.4	17.4153	0.00207648
0.4	17.4153	0.00187887
0.4	17.4153	0.00170007
0.4	17.4153	0.00153829
0.4	17.4153	0.0013919
0.4	17.4153	0.00125945
0.4	17.4153	0.00113959
0.4	17.4153	0.00103115
0.4	17.4153	0.000933021
0.4	17.4153	0
0.45	18.5037	0.624376
0.45	18.5037	0.623829
0.45	18.5037	0.623738
0.45	18.5037	0.623652
0.45	18.5037	0.623578
0.45	18.5037	0.623509
0.45	18.5037	0.620275
0.45	18.5037	0.619649
0.45	18.5037	0.615883
0.45	18.5037	0.613042
0.45	18.5037	0.611464
0.45	18.5037	0.599999
0.45	18.5037	0.586524
0.45	18.5037	0.566891
0.45	18.5037	0.548765
0.45	18.5037	0.53428
0.45	18.5037	0.508732
0.45	18.5037	0.489382
0.45	18.5037	0.460561
0.45	18.5037	0.440849
0.45	18.5037	0.413064
0.45	18.5037	0.379744
0.45	18.5037	0.354202
0.45	18.5037	0.315894
0.45	18.5037	0.290045
0.45	18.5037	0.264792
0.45	18.5037	0.237435
0.45	18.5037	0.212775
0.45	18.5037	0.178797
0.45	18.5037	0.144788
0.45	18.5037	0.125311
0.45	18.5037	0.101409
0.45	18.5037	0.0917583
0.45	18.5037	0.0830263
0.45	18.5037	0.0751253
0.45	18.5037	0.0679762
0.45	18.5037	0.0615074
0.45	18.5037	0.0556542
0.45	18.5037	0.050358
0.45	18.5037	0.0455658
0.45	18.5037	0.0412297
0.45	18.5037	0.0373061
0.45	18.5037	0.033756
0.45	18.5037	0.0305437
0.45	18.5037	0.0276371
0.45	18.5037	0.025007
0.45	18.5037	0.0226273
0.45	18.5037	0.020474
0.45	18.5037	0.0185257
0.45	18.5037	0.0167627
0.45	18.5037	0.0151675
0.45	18.5037	0.0137242
0.45	18.5037	0.0124181
0.45	18.5037	0.0112364
0.45	18.5037	0.0101671
0.45	18.5037	0.00919958
0.45	18.5037	0.00832412
0.45	18.5037	0.00753198
0.45	18.5037	0.00681522
0.45	18.5037	0.00616666
0.45	18.5037	0.00557983
0.45	18.5037	0.00504884
0.45	18.5037	0.00456838
0.45	18.5037	0.00413364
0.45	18.5037	0.00374027
0.45	18.5037	0.00338434
0.45	18.5037	0.00306227
0.45	18.5037	0.00277086
0.45	18.5037	0.00250718
0.45	18.5037	0.00226859
0.45	18.5037	0.0020527
0.45	18.5037	0.00185736
0.45	18.5037	0.00168061
0.45	18.5037	0.00152068
0.45	18.5037	0.00137597
0.45	18.5037	0.00124503
0.45	18.5037	0.00112655
0.45	18.5037	0
0.5	19.5922	0.709726
0.5	19.5922	0.709551
0.5	19.5922	0.709606
0.5	19.5922	0.709624
0.5	19.5922	0.70964
0.5	19.5922	0.709614
0.5	19.5922	0.694344
0.5	19.5922	0.691485
0.5	19.5922	0.687235
0.5	19.5922	0.682553
0.5	19.5922	0.686581
0.5	19.5922	0.667977
0.5	19.5922	0.648552
0.5	19.5922	0.621889
0.5	19.5922	0.583464
0.5	19.5922	0.564096
0.5	19.5922	0.535622
0.5	19.5922	0.515644
0.5	19.5922	0.486608
0.5	19.5922	0.467564
0.5	19.5922	0.438628
0.5	19.5922	0.405818
0.5	19.5922	0.380377
0.5	19.5922	0.343455
0.5	19.5922	0.316704
0.5	19.5922	0.290242
0.5	19.5922	0.263906
0.5	19.5922	0.236883
0.5	19.5922	0.20343
0.5	19.5922	0.172714
0.5	19.5922	0.15483
0.5	19.5922	0.129962
0.5	19.5922	0.117595
0.5	19.5922	0.106404
0.5	19.5922	0.0962785
0.5	19.5922	0.0871164
0.5	19.5922	0.0788262
0.5	19.5922	0.0713249
0.5	19.5922	0.0645374
0.5	19.5922	0.0583959
0.5	19.5922	0.0528388
0.5	19.5922	0.0478105
0.5	19.5922	0.0432607
0.5	19.5922	0.0391439
0.5	19.5922	0.0354189
0.5	19.5922	0.0320483
0.5	19.5922	0.0289985
0.5	19.5922	0.026239
0.5	19.5922	0.023742
0.5	19.5922	0.0214826
0.5	19.5922	0.0194383
0.5	19.5922	0.0175885
0.5	19.5922	0.0159147
0.5	19.5922	0.0144002
0.5	19.5922	0.0130299
0.5	19.5922	0.0117899
0.5	19.5922	0.010668
0.5	19.5922	0.00965278
0.5	19.5922	0.00873419
0.5	19.5922	0.00790302
0.5	19.5922	0.00715095
0.5	19.5922	0.00647045
0.5	19.5922	0.0058547
0.5	19.5922	0.00529756
0.5	19.5922	0.00479343
0.5	19.5922	0.00433727
0.5	19.5922	0.00392453
0.5	19.5922	0.00355106
0.5	19.5922	0.00321313
0.5	19.5922	0.00290736
0.5	19.5922	0.00263069
0.5	19.5922	0.00238035
0.5	19.5922	0.00215383
0.5	19.5922	0.00194886
0.5	19.5922	0.0017634
0.5	19.5922	0.00159559
0.5	19.5922	0.00144375
0.5	19.5922	0
0.55	20.6807	0.718192
0.55	20.6807	0.718312
0.55	20.6807	0.718265
0.55	20.6807	0.718225
0.55	20.6807	0.718188
0.55	20.6807	0.718135
0.55	20.6807	0.694243
0.55	20.6807	0.692044
0.55	20.6807	0.689109
0.55	20.6807	0.685071
0.55	20.6807	0.692351
0.55	20.6807	0.676301
0.55	20.6807	0.657075
0.55	20.6807	0.631616
0.55	20.6807	0.587701
0.55	20.6807	0.564397
0.55	20.6807	0.533398
0.55	20.6807	0.509866
0.55	20.6807	0.483144
0.55	20.6807	0.463351
0.55	20.6807	0.436051
0.55	20.6807	0.407158
0.55	20.6807	0.383163
0.55	20.6807	0.348221
0.55	20.6807	0.324875
0.55	20.6807	0.300295
0.55	20.6807	0.274001
0.55	20.6807	0.243329
0.55	20.6807	0.206524
0.55	20.6807	0.174704
0.55	20.6807	0.154969
0.55	20.6807	0.132238
0.55	20.6807	0.119654
0.55	20.6807	0.108267
0.55	20.6807	0.0979644
0.55	20.6807	0.0886418
0.55	20.6807	0.0802064
0.55	20.6807	0.0725738
0.55	20.6807	0.0656675
0.55	20.6807	0.0594184
0.55	20.6807	0.053764
0.55	20.6807	0.0486477
0.55	20.6807	0.0440182
0.55	20.6807	0.0398293
0.55	20.6807	0.0360391
0.55	20.6807	0.0326095
0.55	20.6807	0.0295063
0.55	20.6807	0.0266984
0.55	20.6807	0.0241577
0.55	20.6807	0.0218588
0.55	20.6807	0.0197787
0.55	20.6807	0.0178965
0.55	20.6807	0.0161934
0.55	20.6807	0.0146524
0.55	20.6807	0.013258
0.55	20.6807	0.0119964
0.55	20.6807	0.0108548
0.55	20.6807	0.00982179
0.55	20.6807	0.00888713
0.55	20.6807	0.00804141
0.55	20.6807	0.00727616
0.55	20.6807	0.00658375
0.55	20.6807	0.00595722
0.55	20.6807	0.00539032
0.55	20.6807	0.00487736
0.55	20.6807	0.00441322
0.55	20.6807	0.00399324
0.55	20.6807	0.00361324
0.55	20.6807	0.00326939
0.55	20.6807	0.00295827
0.55	20.6807	0.00267675
0.55	20.6807	0.00242202
0.55	20.6807	0.00219154
0.55	20.6807	0.00198299
0.55	20.6807	0.00179428
0.55	20.6807	0.00162353
0.55	20.6807	0.00146903
0.55	20.6807	0
0.6	21.7691	0.733438
0.6	21.7691	0.733937
0.6	21.7691	0.733915
0.6	21.7691	0.733902
0.6	21.7691	0.733878
0.6	21.7691	0.733842
0.6	21.7691	0.707662
0.6	21.7691	0.704944
0.6	21.7691	0.702982
0.6	21.7691	0.698892
0.6	21.7691	0.698936
0.6	21.7691	0.68534
0.6	21.7691	0.671248
0.6	21.7691	0.64962
0.6	21.7691	0.611125
0.6	21.7691	0.592833
0.6	21.7691	0.560988
0.6	21.7691	0.531132
0.6	21.7691	0.500886
0.6	21.7691	0.479166
0.6	21.7691	0.448526
0.6	21.7691	0.416901
0.6	21.7691	0.390997
0.6	21.7691	0.354795
0.6	21.7691	0.328915
0.6	21.7691	0.306513
0.6	21.7691	0.279237
0.6	21.7691	0.246079
0.6	21.7691	0.209261
0.6	21.7691	0.17777
0.6	21.7691	0.157274
0.6	21.7691	0.135067
0.6	21.7691	0.122213
0.6	21.7691	0.110583
0.6	21.7691	0.10006
0.6	21.7691	0.0905379
0.6	21.7691	0.081922
0.6	21.7691	0.0741261
0.6	21.7691	0.0670721
0.6	21.7691	0.0606893
0.6	21.7691	0.054914
0.6	21.7691	0.0496882
0.6	21.7691	0.0449598
0.6	21.7691	0.0406813
0.6	21.7691	0.0368099
0.6	21.7691	0.033307
0.6	21.7691	0.0301374
0.6	21.7691	0.0272695
0.6	21.7691	0.0246744
0.6	21.7691	0.0223264
0.6	21.7691	0.0202017
0.6	21.7691	0.0182793
0.6	21.7691	0.0165398
0.6	21.7691	0.0149658
0.6	21.7691	0.0135416
0.6	21.7691	0.012253
0.6	21.7691	0.0110869
0.6	21.7691	0.0100319
0.6	21.7691	0.00907722
0.6	21.7691	0.00821341
0.6	21.7691	0.0074318
0.6	21.7691	0.00672457
0.6	21.7691	0.00608464
0.6	21.7691	0.00550561
0.6	21.7691	0.00498168
0.6	21.7691	0.00450761
0.6	21.7691	0.00407866
0.6	21.7691	0.00369052
0.6	21.7691	0.00333932
0.6	21.7691	0.00302154
0.6	21.7691	0.00273401
0.6	21.7691	0.00247383
0.6	21.7691	0.00223842
0.6	21.7691	0.0020254
0.6	21.7691	0.00183266
0.6	21.7691	0.00165826
0.6	21.7691	0.00150045
0.6	21.7691	0
0.65	22.8576	0.687376
0.65	22.8576	0.688228
0.65	22.8576	0.688206
0.65	22.8576	0.688217
0.65	22.8576	0.688202
0.65	22.8576	0.688181
0.65	22.8576	0.670723
0.65	22.8576	0.669031
0.65	22.8576	0.666629
0.65	22.8576	0.663737
0.65	22.8576	0.664344
0.65	22.8576	0.651628
0.65	22.8576	0.638692
0.65	22.8576	0.617177
0.65	22.8576	0.583208
0.65	22.8576	0.569479
0.65	22.8576	0.539724
0.65	22.8576	0.516417
0.65	22.8576	0.486866
0.65	22.8576	0.464475
0.65	22.8576	0.435259
0.65	22.8576	0.405301
0.65	22.8576	0.382046
0.65	22.8576	0.346694
0.65	22.8576	0.321046
0.65	22.8576	0.298109
0.65	22.8576	0.270775
0.65	22.8576	0.2373
0.65	22.8576	0.198317
0.65	22.8576	0.166663
0.65	22.8576	0.14605
0.65	22.8576	0.124103
0.65	22.8576	0.112293
0.65	22.8576	0.101607
0.65	22.8576	0.091938
0.65	22.8576	0.083189
0.65	22.8576	0.0752725
0.65	22.8576	0.0681094
0.65	22.8576	0.0616279
0.65	22.8576	0.0557632
0.65	22.8576	0.0504567
0.65	22.8576	0.0456551
0.65	22.8576	0.0413104
0.65	22.8576	0.0373792
0.65	22.8576	0.0338221
0.65	22.8576	0.0306035
0.65	22.8576	0.0276912
0.65	22.8576	0.025056
0.65	22.8576	0.0226716
0.65	22.8576	0.0205142
0.65	22.8576	0.018562
0.65	22.8576	0.0167956
0.65	22.8576	0.0151973
0.65	22.8576	0.013751
0.65	22.8576	0.0124425
0.65	22.8576	0.0112584
0.65	22.8576	0.010187
0.65	22.8576	0.0092176
0.65	22.8576	0.00834043
0.65	22.8576	0.00754673
0.65	22.8576	0.00682857
0.65	22.8576	0.00617874
0.65	22.8576	0.00559076
0.65	22.8576	0.00505873
0.65	22.8576	0.00457733
0.65	22.8576	0.00414174
0.65	22.8576	0.0037476
0.65	22.8576	0.00339097
0.65	22.8576	0.00306827
0.65	22.8576	0.00277629
0.65	22.8576	0.00251209
0.65	22.8576	0.00227303
0.65	22.8576	0.00205673
0.65	22.8576	0.001861
0.65	22.8576	0.0016839
0.65	22.8576	0.00152366
0.65	22.8576	0.00137866
0.65	22.8576	0
0.69	23.946	0.583888
0.69	23.946	0.584768
0.69	23.946	0.584806
0.69	23.946	0.584866
0.69	23.946	0.584914
0.69	23.946	0.584934
0.69	23.946	0.571513
0.69	23.946	0.569916
0.69	23.946	0.569002
0.69	23.946	0.566698
0.69	23.946	0.56854
0.69	23.946	0.55993
0.69	23.946	0.551924
0.69	23.946	0.537021
0.69	23.946	0.515749
0.69	23.946	0.508612
0.69	23.946	0.487791
0.69	23.946	0.473973
0.69	23.946	0.450171
0.69	23.946	0.433092
0.69	23.946	0.408374
0.69	23.946	0.382541
0.69	23.946	0.361698
0.69	23.946	0.331137
0.69	23.946	0.309851
0.69	23.946	0.289224
0.69	23.946	0.263813
0.69	23.946	0.230268
0.69	23.946	0.192332
0.69	23.946	0.161434
0.69	23.946	0.140879
0.69	23.946	0.118968
0.69	23.946	0.107646
0.69	23.946	0.0974024
0.69	23.946	0.0881334
0.69	23.946	0.0797464
0.69	23.946	0.0721575
0.69	23.946	0.0652908
0.69	23.946	0.0590776
0.69	23.946	0.0534556
0.69	23.946	0.0483686
0.69	23.946	0.0437657
0.69	23.946	0.0396009
0.69	23.946	0.0358323
0.69	23.946	0.0324225
0.69	23.946	0.029337
0.69	23.946	0.0265453
0.69	23.946	0.0240191
0.69	23.946	0.0217334
0.69	23.946	0.0196652
0.69	23.946	0.0177938
0.69	23.946	0.0161005
0.69	23.946	0.0145683
0.69	23.946	0.013182
0.69	23.946	0.0119276
0.69	23.946	0.0107925
0.69	23.946	0.00976545
0.69	23.946	0.00883615
0.69	23.946	0.00799528
0.69	23.946	0.00723443
0.69	23.946	0.00654598
0.69	23.946	0.00592305
0.69	23.946	0.0053594
0.69	23.946	0.00484938
0.69	23.946	0.0043879
0.69	23.946	0.00397034
0.69	23.946	0.00359251
0.69	23.946	0.00325064
0.69	23.946	0.0029413
0.69	23.946	0.0026614
0.69	23.946	0.00240813
0.69	23.946	0.00217897
0.69	23.946	0.00197161
0.69	23.946	0.00178399
0.69	23.946	0.00161422
0.69	23.946	0.00146061
0.69	23.946	0.00132161
0.69	23.946	0
0.75	25.0345	0.525855
0.75	25.0345	0.526582
0.75	25.0345	0.526498
0.75	25.0345	0.526473
0.75	25.0345	0.526445
0.75	25.0345	0.52641
0.75	25.0345	0.51547
0.75	25.0345	0.515098
0.75	25.0345	0.514346
0.75	25.0345	0.5134
0.75	25.0345	0.515633
0.75	25.0345	0.511696
0.75	25.0345	0.509318
0.75	25.0345	0.499509
0.75	25.0345	0.484239
0.75	25.0345	0.481753
0.75	25.0345	0.465498
0.75	25.0345	0.456181
0.75	25.0345	0.436437
0.75	25.0345	0.423631
0.75	25.0345	0.402257
0.75	25.0345	0.378492
0.75	25.0345	0.359038
0.75	25.0345	0.330523
0.75	25.0345	0.310418
0.75	25.0345	0.290583
0.75	25.0345	0.266415
0.75	25.0345	0.235792
0.75	25.0345	0.199039
0.75	25.0345	0.168244
0.75	25.0345	0.148239
0.75	25.0345	0.126116
0.75	25.0345	0.114114
0.75	25.0345	0.103255
0.75	25.0345	0.0934288
0.75	25.0345	0.0845379
0.75	25.0345	0.0764931
0.75	25.0345	0.0692138
0.75	25.0345	0.0626272
0.75	25.0345	0.0566675
0.75	25.0345	0.0512748
0.75	25.0345	0.0463954
0.75	25.0345	0.0419803
0.75	25.0345	0.0379853
0.75	25.0345	0.0343706
0.75	25.0345	0.0310998
0.75	25.0345	0.0281402
0.75	25.0345	0.0254623
0.75	25.0345	0.0230393
0.75	25.0345	0.0208468
0.75	25.0345	0.018863
0.75	25.0345	0.0170679
0.75	25.0345	0.0154437
0.75	25.0345	0.013974
0.75	25.0345	0.0126442
0.75	25.0345	0.011441
0.75	25.0345	0.0103522
0.75	25.0345	0.00936707
0.75	25.0345	0.00847567
0.75	25.0345	0.00766911
0.75	25.0345	0.00693929
0.75	25.0345	0.00627893
0.75	25.0345	0.00568141
0.75	25.0345	0.00514076
0.75	25.0345	0.00465155
0.75	25.0345	0.00420889
0.75	25.0345	0.00380837
0.75	25.0345	0.00344595
0.75	25.0345	0.00311803
0.75	25.0345	0.00282131
0.75	25.0345	0.00255282
0.75	25.0345	0.00230989
0.75	25.0345	0.00209008
0.75	25.0345	0.00189118
0.75	25.0345	0.00171121
0.75	25.0345	0.00154837
0.75	25.0345	0.00140102
0.75	25.0345	0
0.8	26.1229	0.480934
0.8	26.1229	0.481671
0.8	26.1229	0.481712
0.8	26.1229	0.48178
0.8	26.1229	0.48182
0.8	26.1229	0.481835
0.8	26.1229	0.471853
0.8	26.1229	0.470906
0.8	26.1229	0.471693
0.8	26.1229	0.470854
0.8	26.1229	0.474195
0.8	26.1229	0.472819
0.8	26.1229	0.473532
0.8	26.1229	0.46797
0.8	26.1229	0.457698
0.8	26.1229	0.459353
0.8	26.1229	0.446891
0.8	26.1229	0.441145
0.8	26.1229	0.426436
0.8	26.1229	0.418405
0.8	26.1229	0.4004
0.8	26.1229	0.379485
0.8	26.1229	0.36219
0.8	26.1229	0.335623
0.8	26.1229	0.316435
0.8	26.1229	0.297582
0.8	26.1229	0.274225
0.8	26.1229	0.245887
0.8	26.1229	0.210747
0.8	26.1229	0.180869
0.8	26.1229	0.161604
0.8	26.1229	0.139236
0.8	26.1229	0.125986
0.8	26.1229	0.113997
0.8	26.1229	0.103148
0.8	26.1229	0.0933325
0.8	26.1229	0.0844508
0.8	26.1229	0.0764142
0.8	26.1229	0.0691425
0.8	26.1229	0.0625627
0.8	26.1229	0.0566091
0.8	26.1229	0.051222
0.8	26.1229	0.0463476
0.8	26.1229	0.041937
0.8	26.1229	0.0379462
0.8	26.1229	0.0343351
0.8	26.1229	0.0310677
0.8	26.1229	0.0281112
0.8	26.1229	0.0254361
0.8	26.1229	0.0230155
0.8	26.1229	0.0208253
0.8	26.1229	0.0188435
0.8	26.1229	0.0170503
0.8	26.1229	0.0154278
0.8	26.1229	0.0139596
0.8	26.1229	0.0126312
0.8	26.1229	0.0114292
0.8	26.1229	0.0103415
0.8	26.1229	0.00935741
0.8	26.1229	0.00846694
0.8	26.1229	0.0076612
0.8	26.1229	0.00693214
0.8	26.1229	0.00627246
0.8	26.1229	0.00567556
0.8	26.1229	0.00513546
0.8	26.1229	0.00464675
0.8	26.1229	0.00420456
0.8	26.1229	0.00380444
0.8	26.1229	0.0034424
0.8	26.1229	0.00311481
0.8	26.1229	0.0028184
0.8	26.1229	0.00255019
0.8	26.1229	0.00230751
0.8	26.1229	0.00208792
0.8	26.1229	0.00188923
0.8	26.1229	0.00170945
0.8	26.1229	0.00154677
0.8	26.1229	0
0.85	27.2114	0.447968
0.85	27.2114	0.448692
0.85	27.2114	0.448736
0.85	27.2114	0.448784
0.85	27.2114	0.448806
0.85	27.2114	0.448809
0.85	27.2114	0.43998
0.85	27.2114	0.439388
0.85	27.2114	0.440321
0.85	27.2114	0.439954
0.85	27.2114	0.444153
0.85	27.2114	0.444448
0.85	27.2114	0.447619
0.85	27.2114	0.44472
0.85	27.2114	0.437946
0.85	27.2114	0.441861
0.85	27.2114	0.431945
0.85	27.2114	0.427634
0.85	27.2114	0.415033
0.85	27.2114	0.407354
0.85	27.2114	0.39112
0.85	27.2114	0.372053
0.85	27.2114	0.355928
0.85	27.2114	0.33196
0.85	27.2114	0.315234
0.85	27.2114	0.297965
0.85	27.2114	0.27656
0.85	27.2114	0.250688
0.85	27.2114	0.218312
0.85	27.2114	0.189416
0.85	27.2114	0.170681
0.85	27.2114	0.148245
0.85	27.2114	0.134138
0.85	27.2114	0.121373
0.85	27.2114	0.109823
0.85	27.2114	0.0993718
0.85	27.2114	0.0899153
0.85	27.2114	0.0813587
0.85	27.2114	0.0736164
0.85	27.2114	0.0666109
0.85	27.2114	0.060272
0.85	27.2114	0.0545364
0.85	27.2114	0.0493466
0.85	27.2114	0.0446506
0.85	27.2114	0.0404015
0.85	27.2114	0.0365568
0.85	27.2114	0.033078
0.85	27.2114	0.0299302
0.85	27.2114	0.027082
[truncated: 5,801 more rows]

## Sheet: 5
E (eV)	DOS
10	0
10.1204	0
10.2914	0
10.4908	0.0050762
10.7187	0.0355331
10.8754	0.0795261
10.9324	0.118443
11.0036	0.165821
11.0748	0.216582
11.1318	0.270728
11.2173	0.324873
11.26	0.384095
11.2885	0.433164
11.3455	0.478849
11.4167	0.531303
11.4594	0.593909
11.5164	0.646362
11.6019	0.695431
11.7016	0.741117
11.8156	0.759729
11.9723	0.737733
12.0862	0.698816
12.1859	0.649746
12.3141	0.588832
12.4566	0.539763
12.6275	0.499154
12.77	0.472081
12.9409	0.463621
13.1688	0.456853
13.4537	0.450085
13.8099	0.443316
14.0093	0.436548
14.2087	0.426396
14.4794	0.402707
14.6788	0.370558
14.864	0.338409
15.0777	0.284264
15.3056	0.225042
15.5335	0.175973
15.8042	0.121827
15.9893	0.0964468
16.146	0.0930626
16.3597	0.0947546
16.5307	0.113367
16.7871	0.160744
16.958	0.208122
17.2002	0.28934
17.3854	0.353638
17.6418	0.417936
17.8554	0.453469
18.0406	0.453469
18.297	0.428088
18.4822	0.389171
18.6959	0.321489
18.9381	0.247039
19.2087	0.179357
19.4651	0.12352
19.7358	0.0778341
20.0207	0.0507615
20.4195	0.0219966
20.8754	0.00846022
21.5021	0
26.6446	0
27.4993	0.00676821
28.3825	0.0219966
29.2799	0.0423013
30.1773	0.0710659
30.7899	0.0913706
31.4309	0.106599
31.9722	0.111675
32.428	0.111675
32.8411	0.111675
33.1688	0.101523
33.5391	0.0744501
33.9095	0.0507615
34.1659	0.0304569
34.5363	0.0203046
34.8924	0.00846022
35.2343	0.0050762
35.7044	0
36	0

## Sheet: 6
E (eV)	Eff (-)
0	0
10	0
10.6757	0.014644
11.2385	0.037657
11.998	0.061715
12.5716	0.088912
13.2963	0.119247
13.9973	0.154812
14.9432	0.195607
15.6576	0.240586
16.8725	0.292887
18.1817	0.354603
19.4103	0.408996
20.6254	0.466527
22.4343	0.528243
24.175	0.59205
25.9294	0.642259
27.8112	0.690377
30.2503	0.740586
33.5239	0.790795
36.9787	0.828452
41.365	0.860879
47.1442	0.883891
53.2312	0.899582
63.569	0.914226
76.9856	0.92364
94.1089	0.933054
123.389	0.940377
169.515	0.948745
226.449	0.952929
287.354	0.955021
369.787	0.959205
489.39	0.96
629.78	0.9613
810.442	0.9623
1161.2	0.963389
1602.76	0.965481
2914.09	0.967573
4334.28	0.968
6568.17	0.969
9907.02	0.97
10000	0.97

## Sheet: 7
Modes	Energy (eV)		Energy trasnfer (w)	Scattered intensity [-]
v'T	0.01		0.0104803	0.133396
v''T	0.024		0.0174673	0.163246
v'L	0.061		0.0270743	0.177239
v''L	0.092		0.0314411	0.154851
v2	0.204		0.0358079	0.132463
v1,3	0.417		0.0375546	0.110075
v3	0.46		0.0445415	0.0783582
v1,3+vL	0.5		0.0524018	0.0904851
2(v1,3)	0.835		0.0646288	0.106343
			0.0716157	0.125
			0.0786026	0.143657
			0.0829694	0.158582
			0.0917031	0.179104
			0.0995634	0.181903
			0.105677	0.171642
			0.113537	0.140858
			0.124017	0.110075
			0.133624	0.0951493
			0.149345	0.0820896
			0.165939	0.0830224
			0.179913	0.0914179
			0.193013	0.102612
			0.2	0.122201
			0.204367	0.123134
			0.208734	0.112873
			0.216594	0.0951493
			0.224454	0.0820896
			0.241048	0.0662314
			0.258515	0.0615672
			0.272489	0.0652985
			0.289083	0.0643657
			0.310917	0.0615672
			0.317031	0.0550373
			0.340611	0.0466418
			0.356332	0.0419776
			0.376419	0.045709
			0.38952	0.056903
			0.40262	0.0718283
			0.416594	0.0820896
			0.426201	0.0820896
			0.436681	0.0746269
			0.448035	0.068097
			0.456769	0.0746269
			0.465502	0.0606344
			0.477729	0.0578358
			0.491703	0.0662314
			0.514411	0.0718283
			0.535371	0.0634328
			0.557205	0.0550373
			0.588646	0.0503731
			0.613101	0.056903
			0.630568	0.0531717
			0.650655	0.0475747
			0.687336	0.0410448
			0.724891	0.0382463
			0.754585	0.0363806
			0.785153	0.0326493
			0.816594	0.0345149
			0.846288	0.0335821
			0.889957	0.0307836

## Sheet: 8
E	Goulet and Jay-Gerin (1988)	E	Pimblott and LaVerne (2007)	E	Gadeyne et al. (2022)	E	OpenTOPAS	E	Present work
0.1	0.0317109	1	0.269338	1	0.248082	0	0.167872	0	0.328049
0.2	0.0306298	2	0.033101	2	0.183064	1	0.146371	1.00305	0.0261019
0.3	0.0295984	3	0.0324042	3	0.117891	2	0.124114	2.0061	0.0250428
0.4	0.0286138	4	0.0303136	4	0.0763969	3	0.107788	3.00916	0.0257904
0.5	0.0276735	5	0.030662	5	0.051073	4	0.096277	4.01221	0.0253855
0.6	0.026775	6	0.0310105	6	0.0354882	5	0.0878689	5.01526	0.0250117
0.7	0.025916	7	0.0310105	7	0.0245901	6	0.0805476	6.01831	0.0237035
0.8	0.0250944	8	0.030662	8	0.0181307	7	0.0350504	7.02137	0.0263199
0.9	0.024308	9	0.0303136	9	0.0158266	8	0.00765291	8.02442	0.024015
1	0.0235552	10	0.028223	10	0.0144282	9	0.00665813	9.02747	0.0246068
1.1	0.022834	11	0.0268293	11	0.0134318	10	0.0049936	10.0305	0.024015
1.2	0.0221429	12	0.025784	12	0.0122457	11	0.00413343	11.0336	0.0261641
1.3	0.0214802	13	0.0247387	13	0.0107925	12	0.00469155	12.0366	0.0243887
1.4	0.0208446	14	0.0271777	14	0.00935975	13	0.00453725	13.0397	0.0226444
1.5	0.0202347	15	0.0299652	15	0.00819348	14	0.00481631	14.0427	0.0235477
1.6	0.0196492	16	0.0324042	16	0.00742238	15	0.00443547	15.0458	0.0118673
1.7	0.0190869	17	0.0334495	17	0.00681975	16	0.00437637	16.0488	0.0126149
1.8	0.0185466	18	0.033101	18	0.0063643	17	0.00387406	17.0519	0.0117427
1.9	0.0180273	19	0.0324042	19	0.00635311	18	0.00358186	18.0549	0.0116181
2	0.017528	20	0.030662	20	0.00619607	19	0.00304015	19.058	0.0117116
2.1	0.0170477	21	0.028223	21	0.00574755	20	0.00300404	20.061	0.0118985
2.2	0.0165855	22	0.0261324	22	0.00538361	21	0.00294166	21.0641	0.0108083
2.3	0.0161406	23	0.0240418	23	0.00519764	22	0.00263633	22.0671	0.0110886
2.4	0.0157122	24	0.0222997	24	0.00554477	23	0.00253127	23.0702	0.0110575
2.5	0.0152994	25	0.0526132	25	0.00628144	24	0.00243606	24.0733	0.0114312
2.6	0.0149017			26	0.00643825	25	0.00208149	25.0763	0.0113689
2.7	0.0145184			27	0.0054345	26	0.00226206	26.0794	0.0106837
2.8	0.0141487			28	0.00385223	27	0.00207492	27.0824	0.0110263
2.9	0.0137921			29	0.00332664	28	0.00211432	28.0855	0.0117116
3	0.013448			30	0.00273552	29	0.00199941	29.0885	0.0109952
3.1	0.0131159			31	0.00238628	30	0.00202567	30.0916	0.00573119
3.2	0.0127952			32	0.00283267	31	0.00183525	31.0946	0.00551316
3.3	0.0124855			33	0.00230941	32	0.00182869	32.0977	0.00585579
3.4	0.0121863			34	0.00228525	33	0.00164812	33.1007	0.00610497
3.5	0.0118972			35	0.00232156	34	0.00172363	34.1038	0.00538857
3.6	0.0116177			36	0.00251062	35	0.00170393	35.1068	0.00619841
3.7	0.0113474			37	0.00320451	36	0.0017105	36.1099	0.00573119
3.8	0.011086			38	0.005336	37	0.00147411	37.1129	0.00507709
3.9	0.0108331			39	0.00617652	38	0.001438	38.116	0.00485906
4	0.0105883			40	0.00707508	39	0.00148396	39.119	0.00551316
4.1	0.0103514			41	0.00602789	40	0.00151679	40.1221	0.00517053
4.2	0.010122			42	0.00480848	41	0.00139532	41.1251	0.00485906
4.3	0.00989982			43	0.00629662	42	0.00138219	42.1282	0.00532627
4.4	0.00968459			44	0.00613205	43	0.0013592	43.1312	0.00538857
4.5	0.00947603			45	0.00651634	44	0.00131652	44.1343	0.00479676
4.6	0.00927389			46	0.00838961	45	0.00127056	45.1374	0.00246068
4.7	0.00907792			47	0.00329929	46	0.0011655	46.1404	0.00252297
4.8	0.00888789					47	0.0012049	47.1435	0.0028033
4.9	0.00870357					48	0.00115237	48.1465	0.00264756
5	0.00852476					49	0.00102104	49.1496	0.00330167
5.1	0.00835124					50	0.00103089	50.1526	0.00277215
5.2	0.00818283					51	0.000978364	51.1557	0.00264756
5.3	0.00801933					52	0.000968515	52.1587	0.00236723
5.4	0.00786057					53	0.0009521	53.1618	0.00227379
5.5	0.00770638					54	0.00102104	54.1648	0.00227379
5.6	0.0075566					55	0.000863456	55.1679	0.00264756
5.7	0.00741107					56	0.000889721	56.1709	0.00221149
5.8	0.00726963					57	0.000801077	57.174	0.00283445
5.9	0.00713215					58	0.000863456	58.177	0.00221149
6	0.00699849					59	0.000663187	59.1801	0.00239838
6.1	0.00686852					60	0.000893004	60.1831	0.00133936
6.2	0.0067421					61	0.000791228	61.1862	0.0013705
6.3	0.00661913					62	0.000686168	62.1892	0.00133936
6.4	0.00649948					63	0.000630356	63.1923	0.00109017
6.5	0.00638304					64	0.000686168	64.1953	0.000934434
6.6	0.00626971					65	0.000659903	65.1984	0.000809843
6.7	0.00615938					66	0.000610657	66.2014	0.000872138
6.8	0.00605195					67	0.000620506	67.2045	0.00121476
6.9	0.00594733					68	0.000544995	68.2076	0.00109017
7	0.00584543					69	0.000558127	69.2106	0.00105903
7.1	0.00574616					70	0.000676319	70.2137	0.000872138
7.2	0.00564943					71	0.000581109	71.2167	0.000965582
7.3	0.00555517					72	0.000587675	72.2198	0.000996729
7.4	0.00546329					73	0.000548278	73.2228	0.000903286
						74	0.000492465	74.2259	0.000996729
						75	0.000597525	75.2289	0.000498365
						76	0.000502315	76.232	0.000436069
						77	0.000531863	77.235	0.000747547
						78	0.000535146	78.2381	0.000654104
						79	0.000538429	79.2411	0.000747547
						80	0.000472767	80.2442	0.000934434
						81	0.000462917	81.2472	0.000685252
						82	0.000433369	82.2503	0.000778695
						83	0.000407105	83.2533	0.000685252
						84	0.000321744	84.2564	0.000685252
						85	0.000390689	85.2594	0.000436069
						86	0.000492465	86.2625	0.000436069
						87	0.000377557	87.2655	0.000529513
						88	0.000361141	88.2686	0.000498365
						89	0.000413671	89.2716	0.000467217
						90	0.000377557	90.2747	0.000249182
						91	0.000302045	91.2778	9.34434e-05
						92	0.000364424	92.2808	0.00056066
						93	0.000334876	93.2839	0.000342626
						94	0.000318461	94.2869	0.000218035
						95	0.000279064	95.29	0.00028033
						96	0.000292196	96.293	0.000342626
						97	0.000295479	97.2961	0.000404921
						98	0.000315178	98.2991	0.000218035
						99	0.000292196	99.3022	0.000529513
						100	0.000249516	100.305	0.000342626
						101	0.000282347	101.308	0.000249182
						102	0.000269214	102.311	0.000218035
						103	0.000216685	103.314	0.000218035
						104	0.000259365	104.317	0.000311478
						105	0.000213402	105.32	0.000186887
						106	0.000210119	106.324	9.34434e-05
						107	0.0002331	107.327	0.000249182
						108	0.000223251	108.33	0.000124591
						109	0.000223251	109.333	0.000186887
						110	0.000239666	110.336	0.000186887
						111	0.000210119	111.339	3.11478e-05
						112	0.0002331	112.342	0.000155739
						113	0.000164155	113.345	3.11478e-05
						114	0.000174004	114.348	0.000218035
						115	0.000154306	115.351	0.000218035
						116	0.000151023	116.354	0.000186887
						117	0.000141173	117.357	0.000124591
						118	0.000226534	118.36	0.000124591
						119	0.000193703	119.363	0.000124591
						120	0.000151023	120.366	0.000124591
						121	0.000183854	121.369	0
						122	0.000200269	122.372	6.22956e-05
						123	0.00013789	123.375	0.000124591
						124	0.000164155	124.378	0
						125	0.000180571	125.382	0.000155739
						126	0.00013789	126.385	0
						127	0.000170721	127.388	3.11478e-05
						128	0.000134607	128.391	9.34434e-05
						129	0.000121475	129.394	0
						130	0.000203552	130.397	0.000155739
						131	0.000124758	131.4	3.11478e-05
						132	0.000151023	132.403	3.11478e-05
						133	0.000128041	133.406	3.11478e-05
						134	0.000131324	134.409	3.11478e-05
						135	0.000124758	135.412	3.11478e-05
						136	0.000131324	136.415	3.11478e-05
						137	7.87944e-05	137.418	0
						138	9.521e-05	138.421	0
						139	0.000141173	139.424	0
						140	0.000157589	140.427	0
						141	0.000101776	141.43	0
						142	9.19269e-05	142.433	3.11478e-05
						143	9.521e-05	143.436	6.22956e-05
						144	9.521e-05	144.44	3.11478e-05
						145	0.000111625	145.443	6.22956e-05
						146	0.000114909	146.446	0
						147	9.19269e-05	147.449	3.11478e-05
						148	8.86438e-05	148.452	3.11478e-05
						149	8.86438e-05	149.455	6.22956e-05
						150	8.20775e-05	150.458	3.11478e-05
						151	9.521e-05	151.461	3.11478e-05
						152	9.521e-05	152.464	0
						153	8.20775e-05	153.467	3.11478e-05
						154	8.20775e-05	154.47	0
						155	9.521e-05	155.473	9.34434e-05
						156	4.92465e-05	156.476	3.11478e-05
						157	8.53606e-05	157.479	0
						158	9.19269e-05	158.482	3.11478e-05
						159	6.89451e-05	159.485	0
						160	8.86438e-05	160.488	6.22956e-05
						161	8.53606e-05	161.491	0
						162	9.84931e-05	162.494	0
						163	7.22282e-05	163.498	3.11478e-05
						164	8.86438e-05	164.501	0
						165	8.20775e-05	165.504	0
						166	8.20775e-05	166.507	0
						167	5.58127e-05	167.51	0
						168	6.23789e-05	168.513	0
						169	8.20775e-05	169.516	0
						170	5.90958e-05	170.519	0
						171	4.26803e-05	171.522	9.34434e-05
						172	8.53606e-05	172.525	0
						173	4.92465e-05	173.528	0
						174	7.55113e-05	174.531	3.11478e-05
						175	6.23789e-05	175.534	0
						176	4.92465e-05	176.537	0
						177	5.90958e-05	177.54	0
						178	5.25296e-05	178.543	0
						179	5.25296e-05	179.546	0
						180	7.87944e-05	180.549	0
						181	8.53606e-05	181.552	0
						182	5.58127e-05	182.556	0
						183	6.89451e-05	183.559	3.11478e-05
						184	6.23789e-05	184.562	0
						185	5.58127e-05	185.565	0
						186	7.22282e-05	186.568	0
						187	5.58127e-05	187.571	0
						188	7.55113e-05	188.574	0
						189	4.92465e-05	189.577	0
						190	5.90958e-05	190.58	0
						191	3.93972e-05	191.583	0
						192	5.25296e-05	192.586	0
						193	6.5662e-05	193.589	0
						194	4.92465e-05	194.592	0
						195	5.25296e-05	195.595	0
						196	4.92465e-05	196.598	0
						197	5.58127e-05	197.601	0
						198	4.26803e-05	198.604	0
						199	4.26803e-05	199.607	0
						200	3.61141e-05	200.61	0
						201	5.25296e-05	201.613	0
						202	6.89451e-05	202.617	0
						203	5.58127e-05	203.62	0
						204	5.58127e-05	204.623	0
						205	3.61141e-05	205.626	0
						206	3.61141e-05	206.629	0
						207	3.61141e-05	207.632	0
						208	4.59634e-05	208.635	0
						209	5.25296e-05	209.638	0
						210	4.92465e-05	210.641	0
						211	3.2831e-05	211.644	0
						212	2.95479e-05	212.647	0
						213	2.62648e-05	213.65	0
						214	3.2831e-05	214.653	0
						215	2.95479e-05	215.656	0
						216	3.2831e-05	216.659	0
						217	2.62648e-05	217.662	0
						218	2.29817e-05	218.665	3.11478e-05
						219	2.95479e-05	219.668	0
						220	1.64155e-05	220.671	0
						221	1.64155e-05	221.675	3.11478e-05
						222	3.2831e-05
						223	5.25296e-05
						224	4.92465e-05
						225	1.96986e-05
						226	2.62648e-05
						227	2.62648e-05
						228	2.29817e-05
						229	3.2831e-05
						230	2.62648e-05
						231	2.62648e-05
						232	3.2831e-05
						233	3.2831e-05
						234	3.93972e-05
						235	3.2831e-05
						236	2.95479e-05
						237	1.96986e-05
						238	3.61141e-05
						239	2.95479e-05
						240	3.2831e-05
						241	2.29817e-05
						242	3.2831e-05
						243	2.29817e-05
						244	2.29817e-05
						245	2.29817e-05
						246	2.29817e-05
						247	2.29817e-05
						248	2.29817e-05
						249	3.2831e-05
						250	2.29817e-05
						251	1.64155e-05
						252	1.96986e-05
						253	2.95479e-05
						254	2.62648e-05
						255	3.61141e-05
						256	3.2831e-05
						257	1.96986e-05
						258	1.31324e-05
						259	1.31324e-05
						260	2.29817e-05
						261	1.96986e-05
						262	1.96986e-05
						263	1.96986e-05
						264	2.29817e-05
						265	1.96986e-05
						266	1.96986e-05
						267	2.62648e-05
						268	1.96986e-05
						269	1.64155e-05
						270	1.96986e-05
						271	9.84931e-06
						272	1.31324e-05
						273	1.96986e-05
						274	1.64155e-05
						275	1.31324e-05
						276	2.29817e-05
						277	2.29817e-05
						278	2.62648e-05
						279	6.5662e-06
						280	1.31324e-05
						281	1.64155e-05
						282	6.5662e-06
						283	1.96986e-05
						284	9.84931e-06
						285	9.84931e-06
						286	9.84931e-06
						287	1.31324e-05
						288	1.64155e-05
						289	1.64155e-05
						290	1.96986e-05
						291	6.5662e-06
						292	9.84931e-06
						293	6.5662e-06
						294	3.2831e-06
						295	1.64155e-05
						296	1.64155e-05
						297	1.96986e-05
						298	6.5662e-06
						299	1.96986e-05
						300	2.29817e-05
						301	6.5662e-06
						302	3.2831e-06
						303	9.84931e-06
						304	9.84931e-06
						305	3.2831e-06
						306	2.29817e-05
						307	6.5662e-06
						308	3.2831e-06
						309	6.5662e-06
						310	6.5662e-06
						311	0
						312	3.2831e-06
						313	1.64155e-05
						314	1.96986e-05
						315	1.64155e-05
						316	9.84931e-06
						317	1.31324e-05
						318	6.5662e-06
						319	9.84931e-06
						320	0
						321	3.2831e-06
						322	3.2831e-06
						323	3.2831e-06
						324	1.31324e-05
						325	0
						326	9.84931e-06
						327	9.84931e-06
						328	6.5662e-06
						329	2.29817e-05
						330	9.84931e-06
						331	6.5662e-06
						332	1.31324e-05
						333	1.64155e-05
						334	6.5662e-06
						335	9.84931e-06
						336	1.31324e-05
						337	3.2831e-06
						338	9.84931e-06
						339	1.31324e-05
						340	6.5662e-06
						341	9.84931e-06
						342	6.5662e-06
						343	9.84931e-06
						344	1.96986e-05
						345	6.5662e-06
						346	0
						347	3.2831e-06
						348	3.2831e-06
						349	3.2831e-06
						350	3.2831e-06
						351	0
						352	3.2831e-06
						353	0
						354	3.2831e-06
						355	0
						356	3.2831e-06
						357	6.5662e-06
						358	9.84931e-06
						359	1.31324e-05
						360	0
						361	6.5662e-06
						362	9.84931e-06
						363	6.5662e-06
						364	3.2831e-06
						365	6.5662e-06
						366	3.2831e-06
						367	6.5662e-06
						368	6.5662e-06
						369	1.31324e-05
						370	3.2831e-06
						371	6.5662e-06
						372	3.2831e-06
						373	3.2831e-06
						374	3.2831e-06
						375	6.5662e-06
						376	3.2831e-06
						377	3.2831e-06
						378	3.2831e-06
						379	6.5662e-06
						380	6.5662e-06
						381	3.2831e-06
						382	3.2831e-06
						383	6.5662e-06
						384	3.2831e-06
						385	3.2831e-06
						386	3.2831e-06
						387	1.31324e-05
						388	3.2831e-06
						389	0
						390	0
						391	3.2831e-06
						392	3.2831e-06
						393	3.2831e-06
						394	3.2831e-06
						395	3.2831e-06
						396	3.2831e-06
						397	0
						398	3.2831e-06
						399	3.2831e-06
						400	6.5662e-06
						401	9.84931e-06
						402	3.2831e-06
						403	3.2831e-06
						404	1.31324e-05
						405	9.84931e-06
						406	3.2831e-06
						407	0
						408	3.2831e-06
						409	0
						410	0
						411	0
						412	0
						413	0
						414	0
						415	3.2831e-06
						416	0
						417	0
						418	3.2831e-06
						419	3.2831e-06
						420	6.5662e-06
						421	0
						422	0
						423	6.5662e-06
						424	0
						425	0
						426	0
						427	3.2831e-06
						428	9.84931e-06
						429	0
						430	6.5662e-06
						431	0
						432	3.2831e-06
						433	0
						434	6.5662e-06
						435	0
						436	3.2831e-06
						437	0
						438	0
						439	0
						440	6.5662e-06
						441	0
						442	3.2831e-06
						443	0
						444	3.2831e-06
						445	3.2831e-06
						446	0
						447	3.2831e-06
						448	0
						449	0
						450	6.5662e-06
						451	3.2831e-06
						452	3.2831e-06
						453	0
						454	3.2831e-06
						455	3.2831e-06
						456	0
						457	0
						458	0
						459	0
						460	0
						461	0
						462	0
						463	3.2831e-06
						464	0
						465	0
						466	3.2831e-06
						467	3.2831e-06
						468	3.2831e-06
						469	3.2831e-06
						470	0
						471	0
						472	0
						473	0
						474	0
						475	0
						476	0
						477	0
						478	2.62648e-05
						479	0
						480	0
						481	0
						482	0
						483	0
						484	0
						485	0
						486	0
						487	0
						488	3.2831e-06
						489	0
						490	0
						491	0
						492	0
						493	2.95479e-05
						494	0
						495	0
						496	0
						497	0
						498	0
						499	0
						500	0
						501	0
						502	0
						503	0
						504	0
						505	0
						506	0
						507	0

## Sheet: 9
E0	Eff
9	0
10	0.001
11	0.01
13.0601	0.241935
13.5519	0.382258
14.0984	0.53871
14.4809	0.653226
15.9016	0.756452
17.1585	0.83871
18.5246	0.940323
19.6721	0.964516
20.929	0.985484
22.459	0.996774
25	1
30	1
40	1
50	1
60	1
